# Supplementary material for: Accurate Modeling of Interfacial Thermal Transport in van der Waals Heterostructures via Hybrid Machine Learning and Registry-Dependent Potentials
Source: Research Square preprint supplement (doi:10.21203/rs.3.rs-6526920/v1), 2025-05-08
Supplement: Supplementary file 1 [file 4b3db810c4a6a8ea9809980d.pdf]

# Supporting Information for “Accurate Modeling of Interfacial Thermal Transport in van der Waals Heterostructures via Hybrid Machine Learning and Registry-Dependent Potentials”

Wenwu Jiang,<sup>1#</sup> Hekai Bu,<sup>1#</sup> Ting Liang,<sup>2#</sup> Penghua Ying,<sup>3</sup> Zheyong Fan,<sup>4</sup> Jianbin Xu,<sup>2</sup>  
Wengen Ouyang<sup>1,5\*</sup>

<sup>1</sup>*Department of Engineering Mechanics, School of Civil Engineering, Wuhan University, Wuhan, Hubei 430072, China*

<sup>2</sup>*Department of Electronic Engineering and Materials Science and Technology Research Center, The Chinese University of Hong Kong, Shatin, N.T., Hong Kong SAR, 999077, P. R. China*

<sup>3</sup>*Department of Physical Chemistry, School of Chemistry, Tel Aviv University, Tel Aviv 6997801, Israel*

<sup>4</sup>*College of Physical Science and Technology, Bohai University, Jinzhou 121013, China*

<sup>5</sup>*State Key Laboratory of Water Resources Engineering and Management, Wuhan University, Wuhan, Hubei 430072, China*

<sup>#</sup>These authors contribute equally to this work.

\*Corresponding authors. Email: [w.g.ouyang@whu.edu.cn](mailto:w.g.ouyang@whu.edu.cn)

This supporting information document includes the following sections:

1. Details of NEP Model Training
2. Details of Interlayer Potential Parameterization
3. Fitting for Bulk Modulus
4. Interlayer Registry Index of Homogeneous MoTe<sub>2</sub> and WTe<sub>2</sub>
5. HNEMD Simulations
6. In-plane and Cross-plane Thermal Conductivity of TMDs
7. Binding and Sliding Energy of Bilayer MoS<sub>2</sub> Calculated using Different DFT Methods

## 1. Details of NEP Model Training

### 1.1. Hyperparameters for NEP training

The NEP models can be trained using the neuroevolution potential *nep* executable in the GPUMD package.<sup>1</sup> The relevant hyperparameters are specified in the *nep.in* input file. The contents of the *nep.in* input file for training the NEP(5 Å, 5 Å) model of MX<sub>2</sub> (where M = Mo/W and X = S/Se/Te) are given below. Since long-range dispersion forces can be captured by interlayer potential or D3, radial and angular cutoffs can be relatively small.

```
type 2 Mo S # parameter can be modified depending on the specific MX2 system.
version 4 # version 4
cutoff 5 5
n_max 8 8
basis_size 12 12
l_max 4 2 0
neuron 50
lambda_e 1.0
lambda_f 1.0
lambda_v 0.1
batch 10000
population 50
generation 1000000
```

### 1.2. NEP training results

By performing single-point DFT calculations on these configurations, we trained their energy, force, and stress using the NEP model. As shown in **Figures S1-S6**, the NEP predicted data matches the DFT reference data very well. The calculated root-mean-square error (RMSE) is very small, indicating that the NEP model has high accuracy.

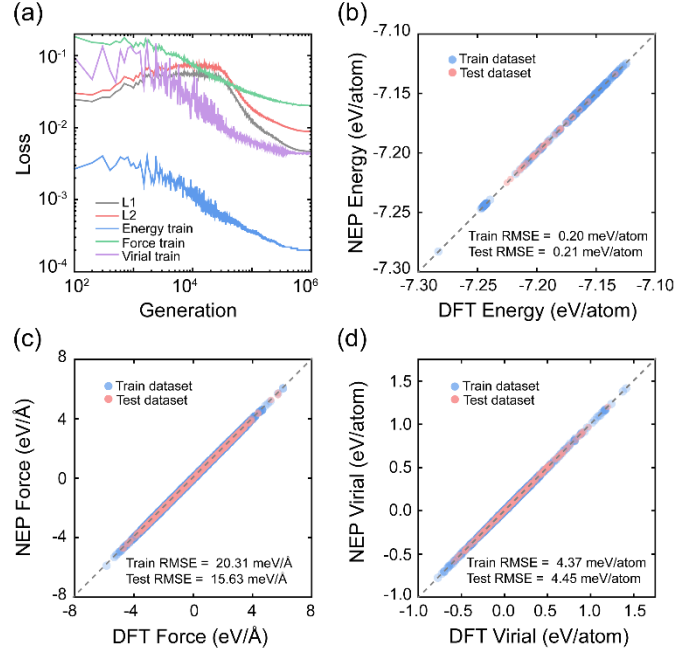

**Figure S1.** (a) Evolution of the various terms in the loss function for the MoS<sub>2</sub> training data set with respect to the generation. Parity plots for (b) total energies, (c) atomic forces obtained, and (d) virials for the NEP training data sets.

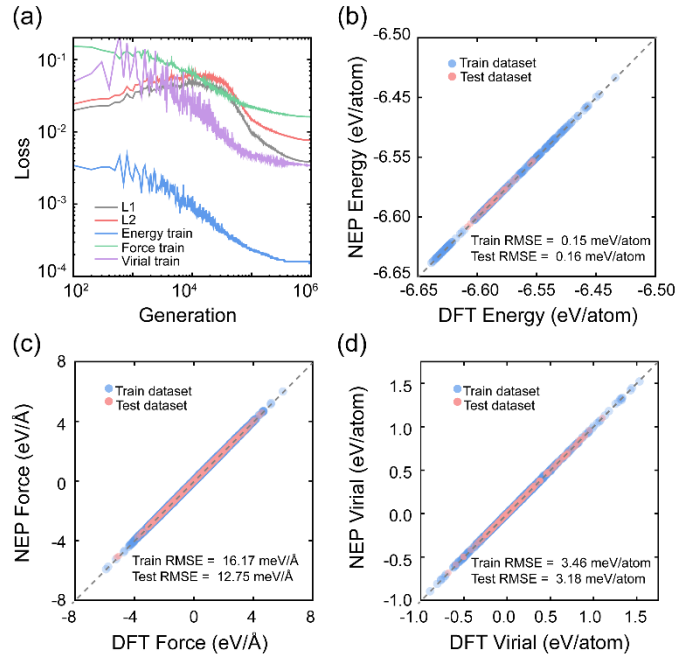

**Figure S2.** (a) Evolution of the various terms in the loss function for the MoSe<sub>2</sub> training data set with respect to the generation. Parity plots for (b) total energies, (c) atomic forces obtained, and (d) virials for the NEP training data sets.

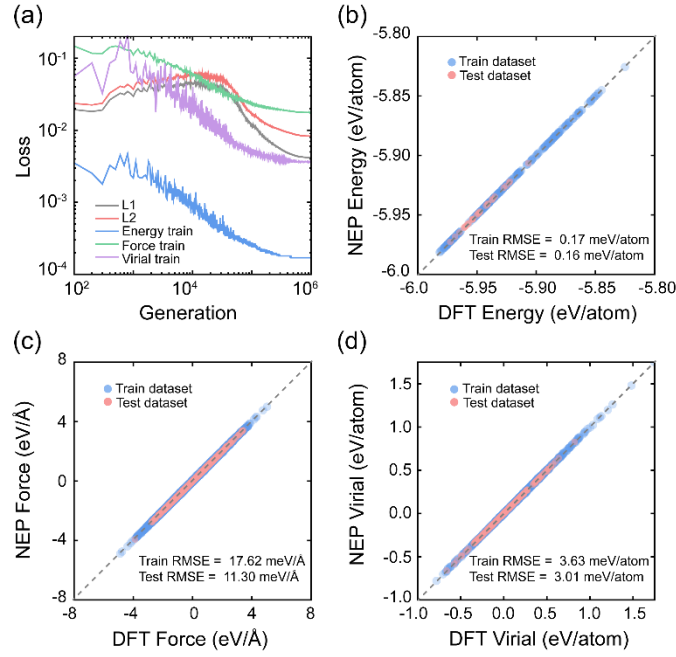

**Figure S3.** (a) Evolution of the various terms in the loss function for the MoTe<sub>2</sub> training data set with respect to the generation. Parity plots for (b) total energies, (c) atomic forces obtained, and (d) virials for the NEP training data sets.

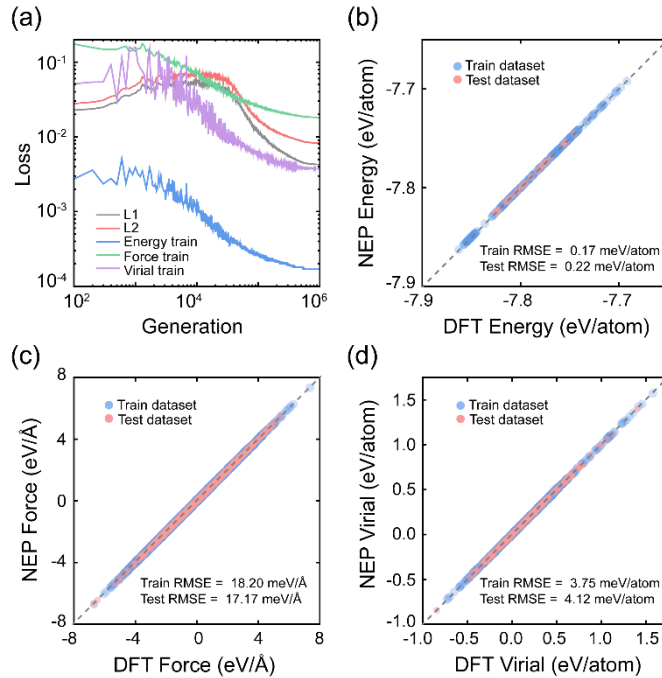

**Figure S4.** (a) Evolution of the various terms in the loss function for the WS<sub>2</sub> training data set with respect to the generation. Parity plots for (b) total energies, (c) atomic forces obtained, and (d) virials for the NEP training data sets.

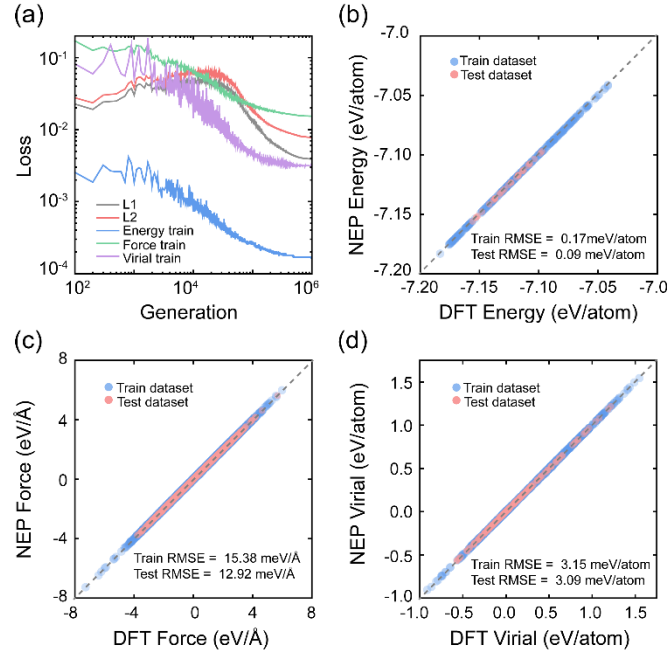

**Figure S5.** (a) Evolution of the various terms in the loss function for the WSe<sub>2</sub> training data set with respect to the generation. Parity plots for (b) total energies, (c) atomic forces obtained, and (d) virials for the NEP training data sets.

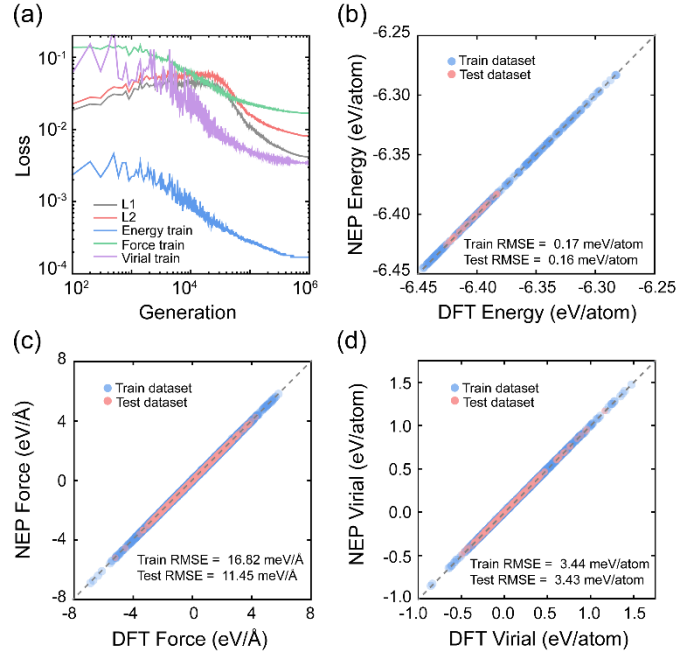

**Figure S6.** (a) Evolution of the various terms in the loss function for the WTe<sub>2</sub> training data set with respect to the generation. Parity plots for (b) total energies, (c) atomic forces obtained, and (d) virials for the NEP training data sets.

## 2. Details of Interlayer Potential Parameterization

### 2.1 ILP Parameterization of $\text{MoTe}_2$ and $\text{WTe}_2$

In our previous studies, we have parameterized the anisotropic interlayer potential to describe the interlayer interactions in homogeneous and heterogeneous interfaces of group-VI transition metal dichalcogenides ( $\text{MX}_2$ , where  $\text{M} = \text{Mo}, \text{W}$ , and  $\text{X} = \text{S}, \text{Se}$ ).<sup>2</sup> However, the current force field did not account for transition metal tellurides ( $\text{MoTe}_2$  and  $\text{WTe}_2$ ). In this work, we further developed the ILP force fields for  $\text{MoTe}_2$  and  $\text{WTe}_2$ . We computed the binding energy (BE) curves and sliding potential energy surfaces (PESs) for two homojunctions ( $\text{MoTe}_2$  and  $\text{WTe}_2$ ). Each BE curve and sliding PES contain 31 and 132 data points, respectively. All DFT reference data were calculated using the MBD-NL-augmented PBE functional,<sup>3</sup> as implemented in the FHI-AIMS code,<sup>4</sup> with the tier-2 basis-set, using tight convergence settings including all grid divisions and 974 outer grids. In order to balance the computational cost and accuracy, five high symmetry stacking modes (as shown in **Figure S7**), including two parallel configurations (AA and AB stacking) and three anti-parallel configurations (AA', AB', and A'B stacking), were utilized to calculate the binding energy curves and sliding potential energy surfaces.

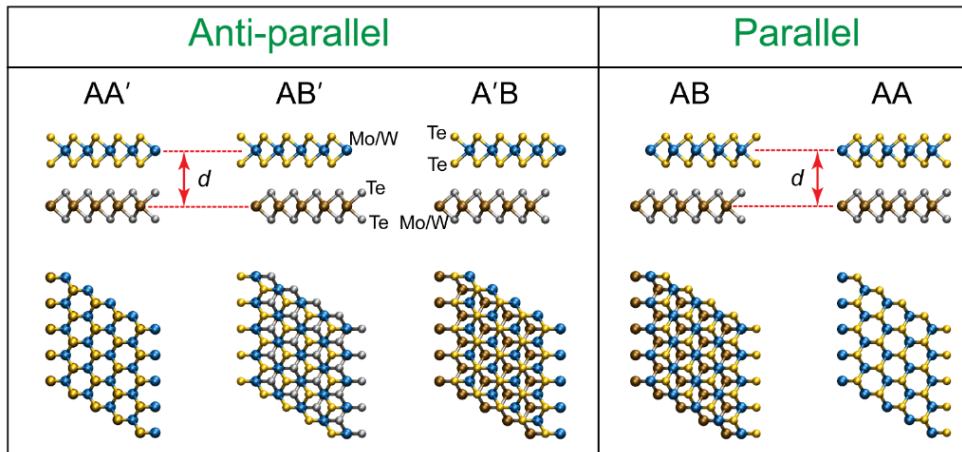

**Figure S7.** A typical configuration  $\text{MoTe}_2/\text{WTe}_2$  with five high symmetry stacking modes considered herein, which includes two parallel configurations (AA and AB stackings) and three anti-parallel configurations (AA', AB', and A'B stackings). For clarity, tellurium, molybdenum, and tungsten atoms residing in different layers are marked with different colors as labeled. The interlayer distance,  $d$ , is defined as the distance between transition metal atoms of adjacent layers.

To ensure the accuracy of our computational findings, we first investigated the convergence of the DFT results by performing BE calculations with different vacuum sizes and  $k$ -grid densities for AA'-stacked bilayer MoTe<sub>2</sub> and WTe<sub>2</sub>, while all other settings, including the convergence criteria of charge density and eigenvalues, are kept unchanged. The testing results are presented in Sec. 2.2. In addition, we also compared the BE and sliding energy barriers of MoTe<sub>2</sub> calculated using both HSE+MBD-NL and PBE+MBD-NL (See Sec. 2.3).

**Figure S8** presents BE curves obtained using PBE+MBD-NL calculations (open symbols) and ILP (solid lines) for bilayer MoTe<sub>2</sub> (left column) and WTe<sub>2</sub> (right column) at interlayer distances ranging from 6-15 Å, respectively. Notably, both the homojunctions MoTe<sub>2</sub> and WTe<sub>2</sub> systems possess almost the same equilibrium interlayer distance (7.1 Å) of AA'-stacked model due to similar intrinsic attributes between MoTe<sub>2</sub> and WTe<sub>2</sub>.

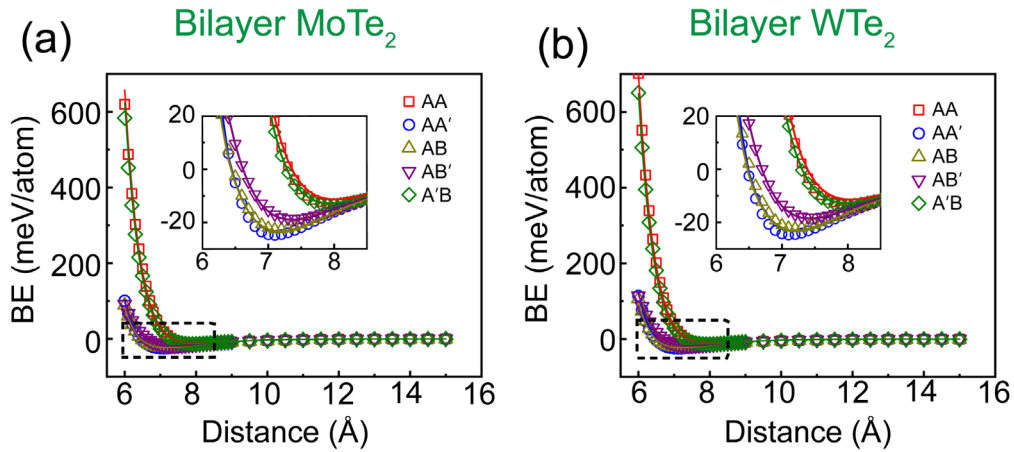

**Figure S8.** Binding energy curves of the laterally periodic structures of bilayer MoTe<sub>2</sub> (a) and WTe<sub>2</sub> (b) calculated using PBE+MBD-NL (open symbols), along with the corresponding ILP fits (solid lines). The reported energies are measured relative to the value obtained for infinitely separated layers and are normalized by the total number of atoms in the unit cell (6 atoms). The insets provide an enlarged view of the equilibrium interlayer distance region for five different stacked configurations.

The sliding PES of periodic bilayer MoTe<sub>2</sub> and WTe<sub>2</sub> with both anti-parallel and parallel configurations are presented in **Figure S9** and **Figure S10**, respectively. The left and middle panels demonstrate the sliding PES calculated using PBE+MBD-NL and ILP at the equilibrium

interlayer distances of the corresponding structure, respectively. While the right panels show the differences between the reference DTF data and the ILP prediction. Excellent qualitative and quantitative agreement between the ILP results and the DFT reference data for all systems is observed from those figures, showing differences within  $\sim 2$  meV/atom.

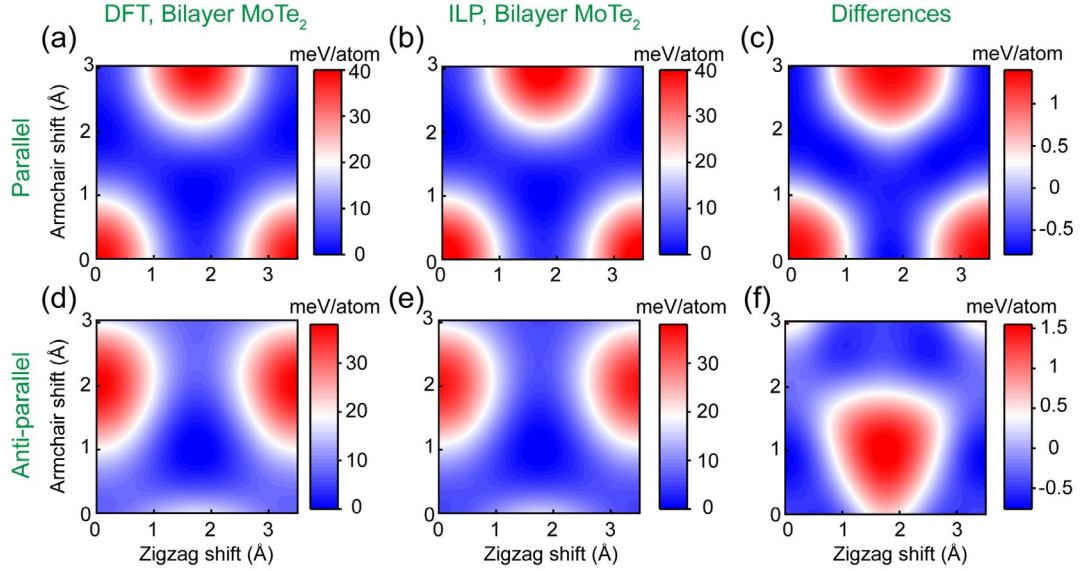

**Figure S9.** Sliding PESs of the laterally periodic bilayer  $\text{MoTe}_2$ , calculated at an interlayer distance of  $7.1 \text{ \AA}$  for top panels (parallel configuration) and bottom panels (anti-parallel configuration). The first and second rows present the sliding PESs obtained for the parallel configuration and the anti-parallel configuration, calculated using PBE+MBD-NL (a, d) and the ILP (b, e). Panels (c) and (f) present the differences between the DFT results and the ILP calculations. All the energies are normalized by the total number of atoms in the unit cell (6 atoms).

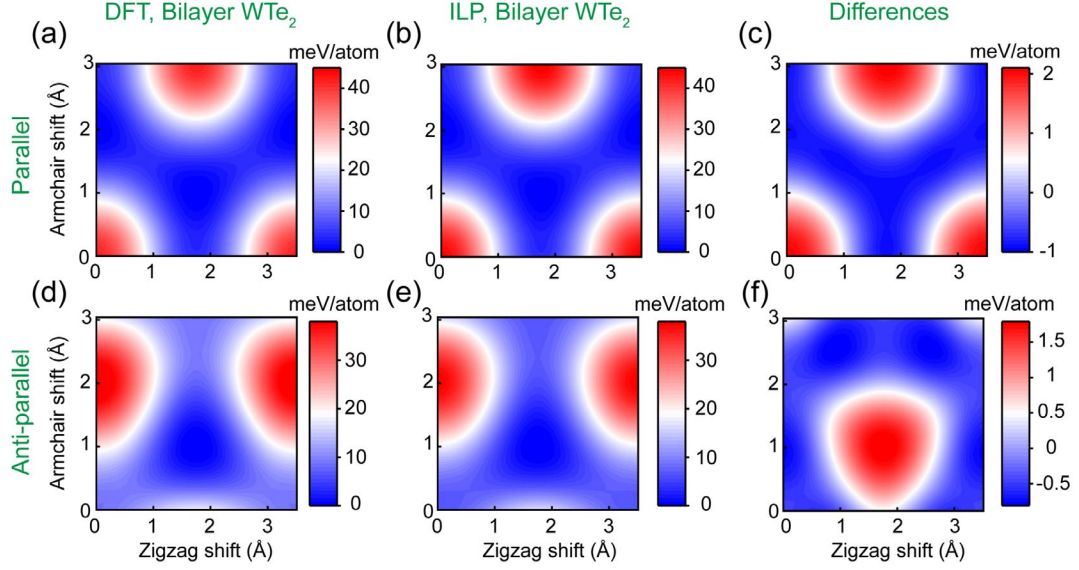

**Figure S10.** Sliding PESs of the laterally periodic bilayer  $\text{WTe}_2$ , calculated at an interlayer distance of 7.1 Å for top panels (parallel configuration) and bottom panels (anti-parallel configuration). The first and second rows present the sliding PESs obtained for the parallel configuration and the anti-parallel configuration, calculated using PBE+MBD-NL (a, d) and the ILP (b, e). Panels (c) and (f) present the differences between the DFT results and the ILP calculations. All the energies are normalized by the total number of atoms in the unit cell (6 atoms).

## 2.2 Convergence Tests of the Reference DFT Calculations

In previous work, we found that achieving convergence of the DFT reference results depends on the appropriate selection of vacuum size and the  $k$ -grid density. To ensure convergence of the DFT results, we performed a series of binding energy (BE) calculations with different vacuum sizes and  $k$ -grid densities for both bilayer  $\text{MoTe}_2$  and  $\text{WTe}_2$  systems. **Figure S11** and **Figure S12** present the BE convergence of  $\text{MoTe}_2$  and  $\text{WTe}_2$  with respect to vacuum size and  $k$ -grid density, respectively, where the red color marks the parameters employed to generate the reference results in the main text. The rest of the parameters are kept the same as detailed in the main text. It can be seen that a vacuum size of 100 Å and a  $k$ -point grid of  $19 \times 19 \times 1$  give good BE convergence of  $\sim 0.05$  meV/atom.

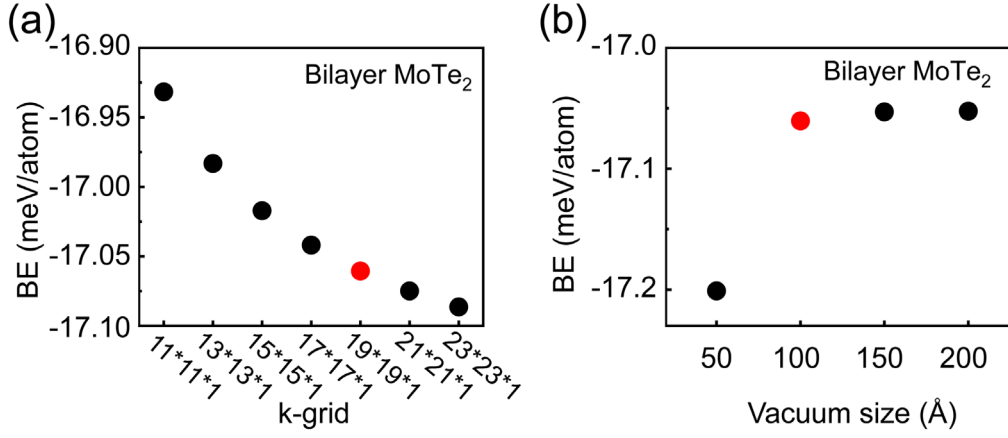

**Figure S11.** BE convergence tests for AA'-stacked bilayer MoTe<sub>2</sub> with respect to  $k$ -grid density (a) and vacuum size (b). The vacuum size in (a) was fixed at 100 Å and the  $k$ -grid in (b) was chosen as 19×19×1. In both cases, the interlayer distance was fixed at 7.1 Å. Notably, all subsequent results for MoTe<sub>2</sub> presented in the following sections were calculated using the values marked with red symbols.

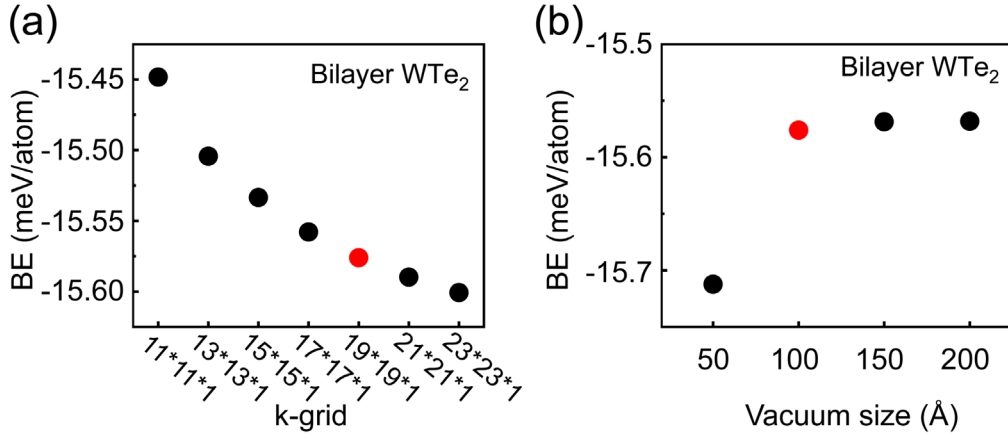

**Figure S12.** BE convergence tests for AA'-stacked bilayer WTe<sub>2</sub> with respect to  $k$ -grid density (a) and vacuum size (b). The vacuum size in (a) was fixed at 100 Å and the  $k$ -grid in (b) was chosen as 19×19×1. In both cases, the interlayer distance was fixed at 7.1 Å. Notably, all subsequent results for WTe<sub>2</sub> presented in the following sections were calculated using the values marked with red symbols.

### 2.3 Effect of DFT Method on Binding Energy of TMD Bilayers

In this section, we investigated the influence of different DFT methods, specifically Heyd–Scuseria–Ernzerhof (HSE) and Perdew–Burke–Ernzerhof (PBE) density functional

approximations, on the BE and sliding energy barriers of bilayer MoTe<sub>2</sub>. All DFT calculations were enhanced with non-local many-body dispersion (MBD-NL) long-range corrections. The binding energies calculated for bilayer AA'-stacked MoTe<sub>2</sub> with the two DFT methods are illustrated in **Figure S13a**. The comparison shows the differences between the binding energies calculated using HSE+MBD-NL (black) and PBE+MBD-NL (red) are 3.78 meV/atom (~13.8%), 4.26 meV/atom (~14.6%), and 4.04 meV/atom (~14.5%) at interlayer distances of 6.9 Å, 7.1 Å, and 7.3 Å, respectively. **Figure S13b** shows the maximum sliding energy barriers at an interlayer distance of 7.1 Å for bilayer MoTe<sub>2</sub>. The sliding energy barriers for parallel and antiparallel configurations calculated using PBE+MBD-NL (red) differ from those calculated using HSE+MBD-NL (black) by 5.49 meV/atom (~12%) and 2.86 meV/atom (~8%), respectively. From these results, we can confidently conclude that PBE+MBD-NL offers a reasonable level of accuracy compared to HSE+MBD-NL. It's worth noting that the computational cost associated with HSE+MBD-NL is approximately 400 times higher than that of PBE+MBD-NL. Therefore, PBE+MBD-NL serves as a cost-effective alternative method suitable for investigating MoTe<sub>2</sub> and WTe<sub>2</sub>.

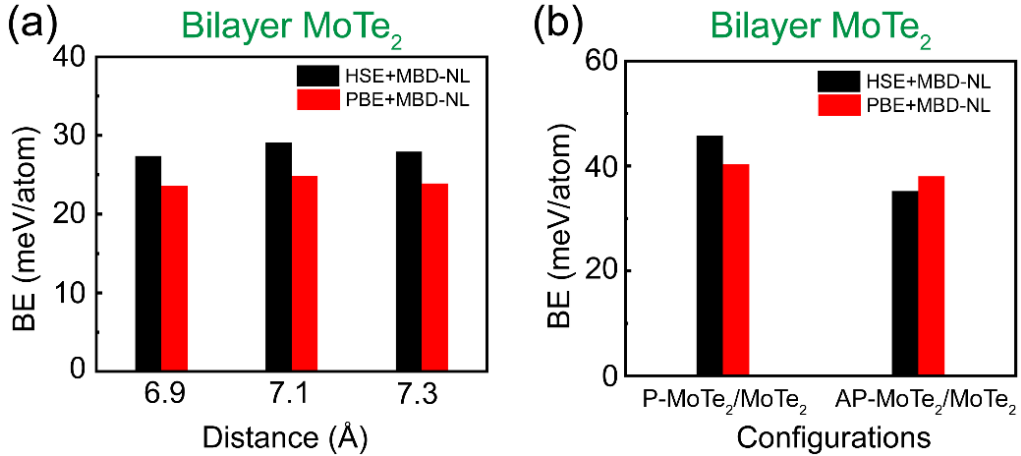

**Figure S13.** (a) Binding energy (a) at interlayer distances of 6.9, 7.1, and 7.3 Å for the AA'-stacked MoTe<sub>2</sub> bilayer and sliding energy barriers (b) under the interlayer distance of 7.1 Å (both parallel and antiparallel configurations) for bilayer MoTe<sub>2</sub> system calculated using HSE+MBD-NL (black) and PBE+MBD-NL (red).

## 2.4 The Local Normal Vectors

For a given atom  $i$ , the surface normal vector  $\mathbf{n}_i$  is calculated with its six nearest neighboring atoms residing in the same sublayer (see **Figure S14**):

$$\mathbf{n}_i = \frac{\mathbf{N}_i}{|\mathbf{N}_i|}, \mathbf{N}_i = \frac{1}{6} \left[ \sum_{k=1}^6 (\mathbf{r}_{k,i} \times \mathbf{r}_{k+1,i}) \right], \quad (\text{S1})$$

where  $\mathbf{r}_{k,i} = \mathbf{r}_k - \mathbf{r}_i$ ,  $k = 1, 2, \dots, 6$ , and the summation is cyclic with  $\mathbf{r}_{7,i} = \mathbf{r}_{1,i}$ .

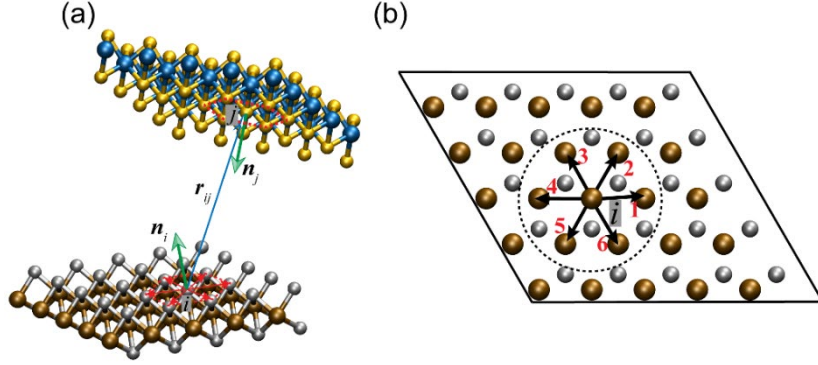

**Figure S14.** Definition of local normal vectors. For each atom  $i$ , its six nearest neighboring atoms within the same sublayer are chosen to define its normal vector  $\mathbf{n}_i$ .

## 2.5 Protocol for Parameterizing the Force Field

In this section, we provide the protocol for parameterizing the interlayer force field. A set of nine pairwise parameters  $\xi = \{\alpha_{ij}, \beta_{ij}, \gamma_{ij}, \varepsilon_{ij}, C_{ij}, d_{ij}, s_{R,ij}, r_{ij}^{\text{eff}}, C_{6,ij}\}$  was obtained by fitting against the  $M = M_b + M_s$  ( $M_b$  and  $M_s$  denoted the number of BE curves sliding PESs, respectively) reference DFT datasets using the least-square method, where each parameter is symmetric with respect to index interchange due to the symmetry of the interaction. To focus on providing a good description of BE curves in the sub-equilibrium regime and the relatively low energy corrugation of the PESs, we define the following objective function:

$$\Phi(\xi) = \sum_{m=1}^{M_b} w_m^b \|E_m^b(\xi) - E_m^{b,\text{DFT}}\|_2 + \sum_{m=1}^{M_s} w^s \|E_m^s(\xi) - E_m^{s,\text{DFT}}\|_2, \quad (\text{S2})$$

where  $w_m^b$  and  $w^s$  are weighting factors used for BE curves and sliding PESs, respectively. Here, we set  $w_m^b(d < d_{\text{eq}}^m) = 1$ ,  $w_m^b(d \geq d_{\text{eq}}^m) = 40$  and  $w^s = 100$  to balanced BE curves and PESs.  $d$  is the interlayer distance and  $d_{\text{eq}}^m$  is its equilibrium value for the  $m^{\text{th}}$  BE curve, and  $\|\cdots\|_2$  is the Euclidean 2-norm that measures the difference between the ILP predictions

and the DFT reference data. ILP parameters were optimized by minimizing this objective function using an interior-point algorithm implemented in the MATLAB software suite.

## 2.6 Interlayer Potential Parameters, Equilibrium Interlayer Distance, and Binding Energy

In this work, all reference data, including BE curves and sliding potential energy surfaces (PESs), were obtained using PBE+MBD-NL. The ILP parameter values obtained by the fitting procedure described in the main text against DFT reference datasets for the various interfaces considered are presented in **Table S1**. The value of  $R_{\text{cut}} = 16 \text{ \AA}$  remains consistent across these sets.

**Table S1.** List of ILP parameters values for laterally periodic bilayer MoTe<sub>2</sub> and WTe<sub>2</sub>. The training set includes all PBE+MBD-NL bilayer BE and PES results appearing in **Figures S8-S10**. In this table, the parameters of the same atomic pair (for example, Mo-Te and Te-Mo) are symmetric.

|       | $\beta_{ij}(\text{\AA})$ | $\alpha_{ij}$ | $\gamma_{ij}(\text{\AA})$ | $\varepsilon_{ij}(\text{meV})$ | $C_{ij}(\text{meV})$ | $d_{ij}$ | $s_{R,ij}$ | $r_{\text{eff},ij}(\text{\AA})$ | $C_{\delta,ij}(\text{eV}\cdot\text{\AA}^6)$ |
|-------|--------------------------|---------------|---------------------------|--------------------------------|----------------------|----------|------------|---------------------------------|---------------------------------------------|
| Mo-Mo | 5.6098                   | 7.8365        | 1.3179                    | 5.5565                         | 267.3421             | 115.7180 | 2.6924     | 2.0937                          | 491.8491                                    |
| W-W   | 6.1150                   | 10.1497       | 1.3724                    | 0.6390                         | 207.7690             | 91.6412  | 1.3011     | 3.5531                          | 491.8505                                    |
| Te-Te | 3.4142                   | 7.9876        | 2.5818                    | 0.9697                         | 250.3381             | 172.6595 | 0.5900     | 3.6183                          | 293.4658                                    |
| Mo-Te | 3.9312                   | 24.9618       | 19.7544                   | 111.2976                       | 182.7056             | 188.3731 | 1.7389     | 2.5846                          | 242.6863                                    |
| W-Te  | 3.9941                   | 23.2878       | 0.0929                    | 14.0313                        | 197.8072             | 207.0843 | 1.5186     | 3.0085                          | 242.6995                                    |

In a previous work, DFT calculations indicate that equilibrium distances for AA'-stacked MoTe<sub>2</sub> bilayers ranged from 6.9  $\text{\AA}$  to 7.5  $\text{\AA}$ , with BEs ranging from 7.5 meV/atom to 25.7 meV/atom. The PBE+MBD-NL, LDA, and D3-BJ methods exhibit comparable BE with differences around  $\sim 3.5\%$ . In contrast, PBE, DF, DF2, optPBE, and optB88 were found to overestimate BEs by  $\sim 58.3\%$ ,  $\sim 67.7\%$ ,  $\sim 69.8\%$ ,  $\sim 47.6\%$ , and  $\sim 36.2\%$ , respectively, compared to PBE+MBD-NL. Other DFT results in **Table S2** differ from PBE+MBD-NL calculations by less than 25%. Furthermore, available DFT results in literatures show that the equilibrium

distances of AA'-stacked WTe<sub>2</sub> bilayers obtained using PBE+MBD-NL vary from other DFT calculations by 0.1% to 5.5%. For BEs of WTe<sub>2</sub> bilayers, the DFT results obtained using methods like LDA, PBE, D3-BJ, DF, DF2, optPBE, and optB88 have shown overestimations compared to that of PBE+MBD-NL by ~24.2%, ~49.4%, ~31.6%, ~56.8%, ~58.2%, ~32.5%, and ~21.1%, respectively. Interestingly, the BE acquired using the dDsC method closely matches with a mere 0.1% disparity. Additionally, other DFT results of bilayer WTe<sub>2</sub> differ from PBE+MBD-NL calculations by less than 8%. Based on the information presented in **Table S2** and **Figure S13**, we can conclude that the PBE+MBD-NL DFT reference data adeptly aligns with the ILP for bilayer structures across the entire range of interlayer distances examined, encompassing even the sub-equilibrium regime.

**Table S2.** Equilibrium interlayer distance,  $d_{eq}$  (Å), and binding energy,  $E_b$  (meV/atom) for MoTe<sub>2</sub> and WTe<sub>2</sub>, calculated at considered stacking modes using PBE+MBD-NL methods, ILP and DFT data from literatures.

| Methods                     |                              |     | PBE+MBD-NL      |                | ILP             |                | Reference data  |                |         |           |
|-----------------------------|------------------------------|-----|-----------------|----------------|-----------------|----------------|-----------------|----------------|---------|-----------|
| Stacking modes<br>(Bilayer) |                              |     | $d_{\text{eq}}$ | $E_{\text{b}}$ | $d_{\text{eq}}$ | $E_{\text{b}}$ | $d_{\text{eq}}$ | $E_{\text{b}}$ | Method  | Reference |
| MoTe <sub>2</sub>           | Anti-Parallel configurations | AA' | 7.1             | 24.8           | 7.2             | 23.3           | 6.9             | 25.7           | LDA     | Ref. 5    |
|                             |                              |     |                 |                |                 |                | 7.5             | 10.3           | PBE     |           |
|                             |                              |     |                 |                |                 |                | 7.0             | 20.7           | D2      |           |
|                             |                              |     |                 |                |                 |                | 7.0             | 20.3           | D3      |           |
|                             |                              |     |                 |                |                 |                | 6.9             | 25.7           | D3-BJ   |           |
|                             |                              |     |                 |                |                 |                | 7.0             | 20.0           | TS      |           |
|                             |                              |     |                 |                |                 |                | 7.0             | 20.2           | TS-iter |           |
|                             |                              |     |                 |                |                 |                | 7.0             | 19.2           | dDsC    |           |
|                             |                              |     |                 |                |                 |                | 7.5             | 8.0            | DF      |           |
|                             |                              |     |                 |                |                 |                | 7.5             | 7.5            | DF2     |           |
|                             |                              |     |                 |                |                 |                | 7.0             | 20.8           | rev-DF2 |           |
|                             |                              |     |                 |                |                 |                | 7.3             | 13.0           | optPBE  |           |
|                             |                              |     |                 |                |                 |                | 7.1             | 15.8           | optB88  |           |
|                             |                              |     |                 |                |                 |                | 7.0             | 20.5           | optB86b |           |
|                             |                              |     |                 |                |                 |                | 7.1             | 18.8           | SCAN    |           |
|                             |                              |     |                 |                |                 | 6.9            | --              | LDA            | Ref. 6  |           |

|                  |                              |     |     |      |     |      |     |      |         |        |
|------------------|------------------------------|-----|-----|------|-----|------|-----|------|---------|--------|
| WTe <sub>2</sub> | Parallel configurations      | AB' | 7.4 | 18.7 | 7.4 | 19.0 | 7.1 | --   | optB88  | Ref. 5 |
|                  |                              |     |     |      |     |      | 7.1 | --   | LDA     |        |
|                  |                              |     |     |      |     |      | 7.3 | --   | optB88  |        |
|                  |                              | A'B | 7.9 | 13.4 | 7.9 | 12.7 | 7.7 | --   | LDA     |        |
|                  |                              |     |     |      |     |      | 7.8 | --   | optB88  |        |
|                  |                              | AB  | 7.2 | 22.6 | 7.2 | 23.2 | 6.9 | --   | LDA     |        |
|                  |                              |     |     |      |     |      | 7.1 | --   | optB88  |        |
|                  |                              | AA  | 8.0 | 12.9 | 8.0 | 11.4 | 7.7 | --   | LDA     |        |
|                  |                              |     |     |      |     |      | 7.8 | --   | optB88  |        |
|                  | Anti-Parallel configurations | AA' | 7.1 | 24.7 | 7.2 | 23.1 | 6.9 | 30.7 | LDA     |        |
|                  |                              |     |     |      |     |      | 7.5 | 12.5 | PBE     |        |
|                  |                              |     |     |      |     |      | 6.9 | 26.5 | D2      |        |
|                  |                              |     |     |      |     |      | 7.0 | 26.7 | D3      |        |
|                  |                              |     |     |      |     |      | 6.9 | 32.5 | D3-BJ   |        |
|                  |                              |     |     |      |     |      | 7.1 | 22.8 | TS      |        |
|                  |                              |     |     |      |     |      | 7.0 | 25.0 | TS-iter |        |
|                  |                              |     |     |      |     |      | 7.0 | 24.7 | dDsC    |        |
|                  |                              |     |     |      |     |      | 7.5 | 10.7 | DF      |        |
|                  |                              |     |     |      |     |      | 7.4 | 10.3 | DF2     |        |
|                  | Parallel configurations      | AB' | 7.4 | 18.2 | 7.2 | 18.5 | 7.1 | --   | LDA     | Ref. 6 |
|                  |                              |     |     |      |     |      | 7.3 | --   | optB88  |        |
|                  |                              |     |     |      |     |      | 7.7 | --   | LDA     |        |
|                  |                              | A'B | 8.0 | 13.5 | 8.0 | 12.6 | 7.8 | --   | optB88  |        |
|                  |                              |     |     |      |     |      | 7.0 | --   | LDA     |        |
|                  |                              | AB  | 7.2 | 22.2 | 7.2 | 23.0 | 7.1 | --   | optB88  |        |
|                  |                              |     |     |      |     |      | 7.8 | --   | LDA     |        |
|                  |                              | AA  | 8.0 | 13.1 | 8.0 | 11.4 | 7.8 | --   | LDA     |        |
|                  |                              |     |     |      |     |      | 7.8 | --   | optB88  |        |
|                  | Anti-Parallel configurations | AA' | 7.1 | 24.7 | 7.2 | 23.1 | 6.9 | --   | LDA     |        |
|                  |                              |     |     |      |     |      | 7.1 | --   | optB88  |        |
|                  |                              |     |     |      |     |      | 7.1 | --   | LDA     |        |
|                  |                              |     |     |      |     |      | 7.3 | --   | optB88  |        |

Intralayer lattice constants of 3.505 and 3.511 Å are used for MoTe<sub>2</sub> and WTe<sub>2</sub>, respectively.

### 3. Fitting for Bulk Modulus

Here, three equations of state (EOS) are used to fit the  $P$ - $V$  curve: the Murnaghan equation (Eq. S3),<sup>7, 8</sup> the Birch-Murnaghan equation (Eq. S4),<sup>9, 10</sup> and the Vinet equation (Eq. S5),<sup>11, 12</sup> which take the following forms:

$$\frac{V}{V_0} = \left[1 + \frac{B'}{B}P\right]^{-\frac{1}{B'}}, \quad (\text{S3})$$

$$P = 3B\xi(1 + 2\xi)^{5/2} \left[1 - \frac{3}{2}(4 - B')\xi\right], \xi = \frac{1}{2} \left[\left(\frac{V}{V_0}\right)^{\frac{2}{3}} - 1\right], \quad (\text{S4})$$

$$P = 3B \frac{(1-X)}{X^2} \exp \left[ \frac{3}{2}(B' - 1)(1 - X) \right], X = \left(\frac{V}{V_0}\right)^{\frac{1}{3}}. \quad (\text{S5})$$

Here,  $V_0$  and  $V$  are the unit cell volumes in the absence and presence of external hydrostatic pressure, and  $B$  and  $B'$  are the bulk modulus and its pressure derivative at zero pressure, respectively. The depiction of the relationship between bulk volume ( $V$ ) and pressure ( $P$ ) exhibits variability among the three equations. In particular, the Murnaghan, Birch-Murnaghan, and Vinet equations display linear, polynomial, and exponential dependencies on pressure, respectively, when fitting the pressure-volume ( $P$ - $V$ ) curve. The corresponding  $P$ - $V$  curve and the outcomes of fitting are illustrated in **Figure S15**.

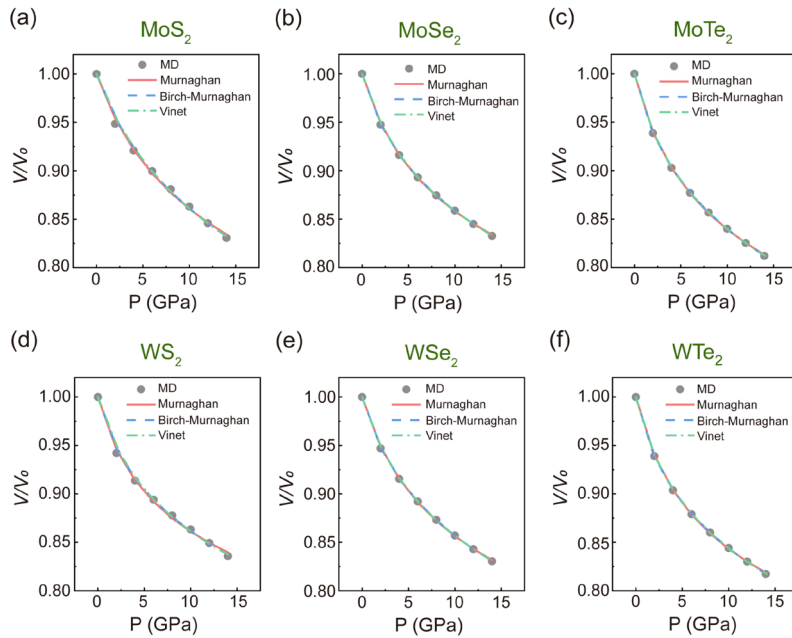

**Figure S15.** Pressure dependence of the normalized volume  $V/V_0$  of bulk MoS<sub>2</sub> (a), MoSe<sub>2</sub> (b), MoTe<sub>2</sub> (c), WS<sub>2</sub> (d), WSe<sub>2</sub> (e), and WTe<sub>2</sub> (f). The solid black points are the NPT simulation results. The solid red lines, dashed blue lines, and dashed-dotted green lines are fitted curves generated using Murnaghan, Birch-Murnaghan, and Vinet EOS, respectively.

The results exhibit a high degree of fitting accuracy against the MD simulation reference data, demonstrated by all three EOS. The bulk modulus,  $B$  (GPa) and its zero-pressure derivative,  $B'$  (GPa) for bulk homojunctions (including MoS<sub>2</sub>, MoSe<sub>2</sub>, MoTe<sub>2</sub>, WS<sub>2</sub>, WSe<sub>2</sub>, and WTe<sub>2</sub>), are calculated using NEP+ILP force field. Remarkably, there is minimal disparity in the bulk moduli obtained through Murnaghan, Birch–Murnaghan, and Vinet EOS fitting, as shown in **Table S3**.

**Table S3.** Bulk modulus,  $B$  (GPa), and zero-pressure derivative,  $B'$  (GPa), of bulk homojunctions (MoS<sub>2</sub>, MoSe<sub>2</sub>, MoTe<sub>2</sub>, WS<sub>2</sub>, WSe<sub>2</sub>, and WTe<sub>2</sub>), calculated using NEP+ILP force field.

| Methods           | Murnaghan EOS  |                | Birch–Murnaghan EOS |                | Vinet EOS      |                |
|-------------------|----------------|----------------|---------------------|----------------|----------------|----------------|
| Stacking modes    | $B$            | $B'$           | $B$                 | $B'$           | $B$            | $B'$           |
| MoS <sub>2</sub>  | $35.1 \pm 5.8$ | $7.8 \pm 1.9$  | $36.2 \pm 6.3$      | $8.7 \pm 2.8$  | $37.0 \pm 5.5$ | $8.1 \pm 1.9$  |
| MoSe <sub>2</sub> | $29.7 \pm 1.6$ | $9.2 \pm 0.6$  | $25.9 \pm 0.6$      | $14.8 \pm 0.5$ | $28.6 \pm 1.1$ | $11.1 \pm 0.5$ |
| MoTe <sub>2</sub> | $24.5 \pm 1.0$ | $8.6 \pm 0.4$  | $20.9 \pm 0.5$      | $14.0 \pm 0.4$ | $23.2 \pm 0.7$ | $10.6 \pm 0.3$ |
| WS <sub>2</sub>   | $25.9 \pm 4.2$ | $11.2 \pm 1.8$ | $22.7 \pm 5.8$      | $19.2 \pm 7.0$ | $27.3 \pm 4.7$ | $12.3 \pm 2.3$ |
| WSe <sub>2</sub>  | $29.8 \pm 1.6$ | $9.0 \pm 0.6$  | $26.4 \pm 0.7$      | $13.8 \pm 0.6$ | $28.8 \pm 1.1$ | $10.7 \pm 0.5$ |
| WTe <sub>2</sub>  | $23.8 \pm 1.1$ | $9.4 \pm 0.5$  | $19.2 \pm 1.0$      | $17.2 \pm 1.3$ | $22.5 \pm 1.1$ | $11.6 \pm 0.5$ |

#### 4. Interlayer Registry Index of Homogeneous MoTe<sub>2</sub> and WTe<sub>2</sub>

The Registry Index (RI)<sup>13, 14</sup> approach offers an intuitive and computationally efficient geometric measure for quantifying interlayer registry in rigid layered material interfaces, both globally (GRI) and spatially resolved at the local scale (LRI), as they undergo relative sliding. For a TMD interface consisting of two layers, marked as  $a$  and  $b$ , and the chemical compositions are marked by  $M^aX_2^a$  and  $M^bX_2^b$ , where  $M^{a/b} = \text{Mo or W}$  and  $X^{a/b} = \text{S, Se or Te}$ , the local

registry index is calculated as 
$$\text{LRI} = f(h_{in}) \times \frac{2\pi(\sigma_{t_i}^{t_n})^2(\sigma_{t_n}^{t_i})^2}{(\sigma_{t_i}^{t_n})^2 + (\sigma_{t_n}^{t_i})^2} e^{-\frac{d_{in}^2}{2(\sigma_{t_i}^{t_n})^2 + 2(\sigma_{t_n}^{t_i})^2}}$$
, where  $\sigma_{t_i}^{t_n}$  represents the effective radius of atoms of type  $t_i$  in one layer when interacting with an atom of type  $t_n$  in its adjacent layer.  $d_{in}$  is the lateral distance between the two atoms and  $f(h_{in}) = \exp[-a(h_{in} - h_{in}^0)]$  is a dimensionless scaling factor, used to describe the dependence of the repulsive interaction on vertical interatomic distance  $h_{in}$ . Here,  $a$  is a fitting parameter and  $h_{in}^0$  is set to the interlayer (vertical) distance between atoms  $i$  and  $n$  at the optimal stacking mode.

Previous studies have extended the RI approach to quantify the interlayer commensurability of both homogeneous and heterogeneous interfaces in MoS<sub>2</sub>, WS<sub>2</sub>, MoSe<sub>2</sub>, and WSe<sub>2</sub>.<sup>13, 14</sup> However, the RI parameterization for MoTe<sub>2</sub> and WTe<sub>2</sub> has remained unavailable. In this work, we successfully extend the RI framework to homogeneous MoTe<sub>2</sub> and WTe<sub>2</sub> structures. **Figure S16** and **Figure S17** demonstrate excellent agreement between the reference DFT calculations and the GRI predictions for MoTe<sub>2</sub> and WTe<sub>2</sub>, further validating the approach. Here, the RI effective radii are independently fitted for the parallel and antiparallel stacking configurations, yielding the following values in **Table S4**.

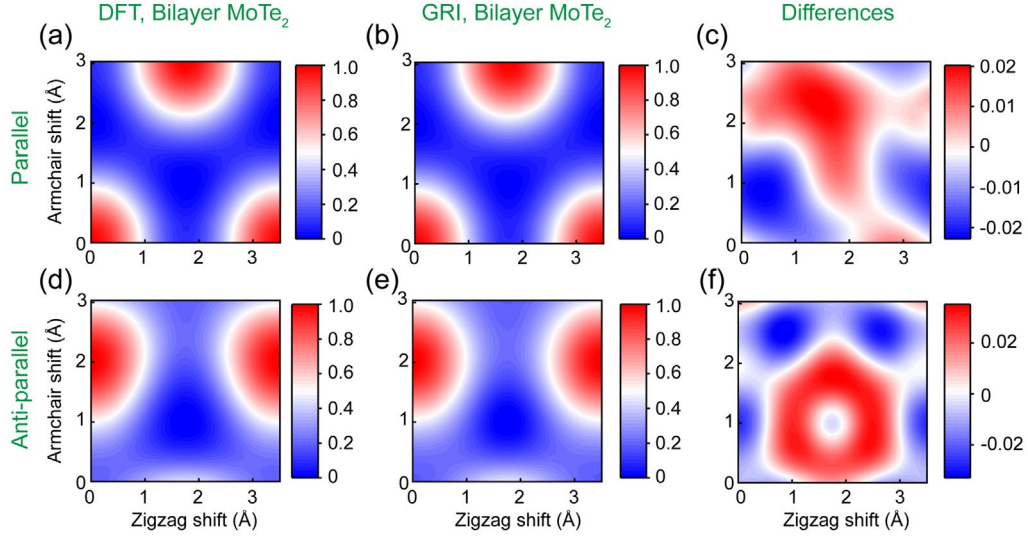

**Figure S16.** Two-dimensional potential energy surfaces (PESs) of bilayer MoTe<sub>2</sub> stacked in the parallel (top) or antiparallel (bottom) orientations calculated using DFT (left column) and the GRI (middle column) under rigid shifts along the armchair and zigzag directions. The energy origins of the DFT PESs obtained for the P and AP orientations are set to the total energies calculated at the same level of theory for the optimal AB and AA' stacking modes at an interlayer distance of 7.1 Å, respectively, and the PESs are normalized by the energy of the worst AA and A'B stacking modes for P and AP interlayer orientations, respectively. The right panels show the difference between the normalized DFT PESs and the corresponding GRI landscapes. Color bars appear to the right of each panel.

**Table S4.** Fitted GRI parameters for homogeneous MoTe<sub>2</sub> and WTe<sub>2</sub> bilayers. The effective radius of each atom pair appearing in the table is given in units of the  $\frac{t}{\sqrt{3}}$ , where  $t$  is the lattice constant (3.505 Å and 3.511 Å are used for MoTe<sub>2</sub> and WTe<sub>2</sub>, respectively). P and AP stand for the parallel and antiparallel interlayer orientations.

| Orientation       |    | $\sigma_{\text{Mo}}^{\text{Mo}}$ | $\sigma_{\text{Mo}}^{\text{Te}}/\sigma_{\text{Te}}^{\text{Mo}}$ | $\sigma_{\text{Te}}^{\text{Te}}$ | $\alpha$ |
|-------------------|----|----------------------------------|-----------------------------------------------------------------|----------------------------------|----------|
| MoTe <sub>2</sub> | P  | 0.10                             | 0.04                                                            | 0.31                             | 1.50     |
|                   | AP | 0.10                             | 0.18                                                            | 0.27                             | 1.50     |
| Orientation       |    | $\sigma_{\text{W}}^{\text{W}}$   | $\sigma_{\text{W}}^{\text{Te}}/\sigma_{\text{Te}}^{\text{W}}$   | $\sigma_{\text{Te}}^{\text{Te}}$ | $\alpha$ |
| WTe <sub>2</sub>  | P  | 0.10                             | 0.04                                                            | 0.32                             | 1.50     |
|                   | AP | 0.10                             | 0.20                                                            | 0.27                             | 1.50     |

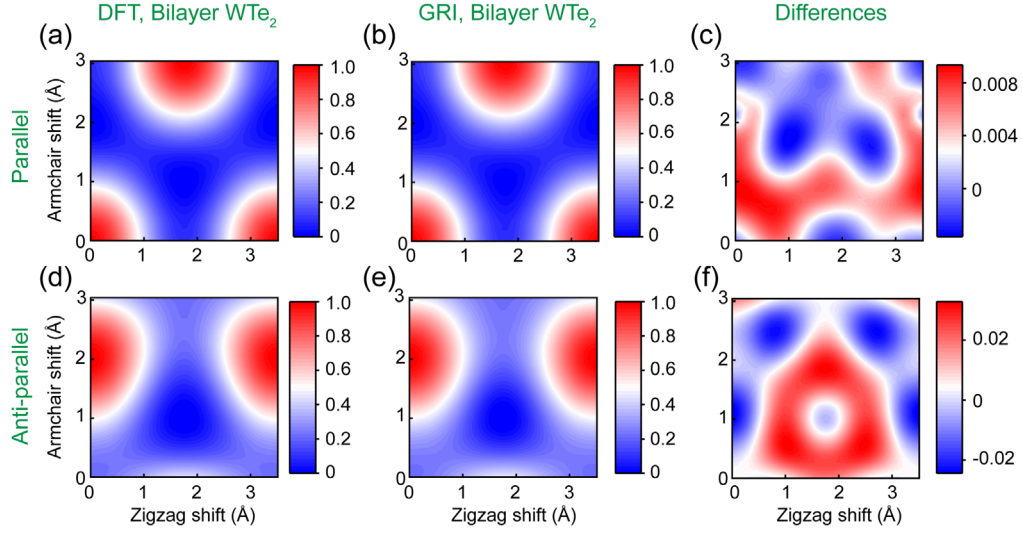

**Figure S17.** Two-dimensional potential energy surfaces (PESs) of bilayer MoTe<sub>2</sub> stacked in the parallel (top) or antiparallel (bottom) orientations calculated using DFT (left column) and the GRI (middle column) under rigid shifts along the armchair and zigzag directions. The energy origins of the DFT PESs obtained for the P and AP orientations are set to the total energies calculated at the same level of theory for the optimal AB and AA' stacking modes at an interlayer distance of 7.1 Å, respectively, and the PESs are normalized by the energy of the worst AA and A'B stacking modes for P and AP interlayer orientations, respectively. The right panels show the difference between the normalized DFT PESs and the corresponding GRI landscapes. Color bars appear to the right of each panel.

## 5. HNEMD Simulations

In the homogeneous nonequilibrium molecular dynamics (HNEMD) simulations, we first equilibrated for 200 ps in the isothermal-isobaric (NPT) ensemble at 300K and zero pressure, followed by a 20 ns production stage in the NVT ensemble. The NPT ensemble was maintained by the Berendsen method. The NVT ensemble was maintained by the Nose–Hoover chain thermostat. The external driving force was added during the production stage. Each HNEMD simulation was carried out for up to 20 ns, and the thermal conductivity was well-sampled within steady-state conditions. For each thermal conductivity calculation, we performed three independent simulations and calculated a suitable estimate of statistical error. The size of TMD system and the value of driving force parameter  $F_e$  are given in **Table S5**.

**Table S5.** The size and the value of driving force parameter using HNEMD simulations of monolayer, bilayer, and bulk homojunctions (MoS<sub>2</sub>, MoSe<sub>2</sub>, MoTe<sub>2</sub>, WS<sub>2</sub>, WSe<sub>2</sub>, and WTe<sub>2</sub>).

|                                | TMDs system                      | MoS <sub>2</sub>     | MoSe <sub>2</sub>    | MoTe <sub>2</sub>    | WS <sub>2</sub>      | WSe <sub>2</sub>     | WTe <sub>2</sub>     |
|--------------------------------|----------------------------------|----------------------|----------------------|----------------------|----------------------|----------------------|----------------------|
| Monolayer<br>( $\kappa_{IP}$ ) | In-plane Size (nm <sup>2</sup> ) | 638.00               | 638.92               | 636.87               | 639.55               | 639.23               | 636.87               |
|                                | Numbers of atoms                 | 21804                | 20064                | 17466                | 21804                | 20064                | 17466                |
|                                | $F_e$ (Å <sup>-1</sup> )         | $1 \times 10^{-5}$   | $1 \times 10^{-5}$   | $1 \times 10^{-5}$   | $1 \times 10^{-5}$   | $8 \times 10^{-6}$   | $8 \times 10^{-6}$   |
| Bilayer<br>( $\kappa_{IP}$ )   | In-plane Size (nm <sup>2</sup> ) | 638.00               | 638.92               | 636.87               | 639.55               | 639.23               | 636.87               |
|                                | Numbers of atoms                 | 43608                | 40128                | 34932                | 43608                | 40128                | 34932                |
|                                | $F_e$ (Å <sup>-1</sup> )         | $9 \times 10^{-6}$   | $1 \times 10^{-5}$   | $1 \times 10^{-5}$   | $9 \times 10^{-6}$   | $8 \times 10^{-6}$   | $1 \times 10^{-5}$   |
| Bulk<br>( $\kappa_{CP}$ )      | Size (nm <sup>3</sup> )          | 318.01               | 365.60               | 453.66               | 323.75               | 370.80               | 453.66               |
|                                | Numbers of atoms                 | 17280                | 17280                | 17280                | 17280                | 17280                | 17280                |
|                                | $F_e$ (Å <sup>-1</sup> )         | $7.5 \times 10^{-6}$ |

**Figure S18** and **Figure S19** show the accumulated averages of the in-plane thermal conductivity for six monolayer and bilayer TMDs (MoS<sub>2</sub>, MoSe<sub>2</sub>, MoTe<sub>2</sub>, WS<sub>2</sub>, WSe<sub>2</sub>, and WTe<sub>2</sub>) at 300 K and zero pressure. The simulations were conducted on square systems with dimensions of 25 nm × 25 nm, comprising 21804 atoms for monolayer configurations and 43608 atoms for bilayer configurations.

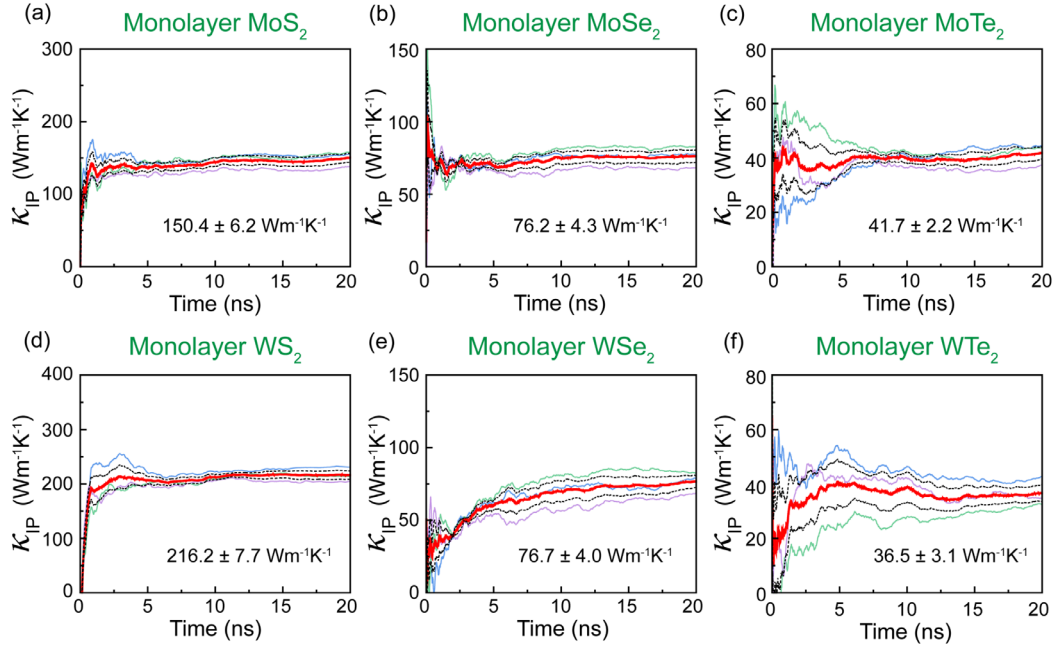

**Figure S18.** Cumulative average of the in-plane thermal conductivity  $\kappa_{IP}$  for monolayer MoS<sub>2</sub> (a), MoSe<sub>2</sub> (b), MoTe<sub>2</sub> (c), WS<sub>2</sub> (d), WSe<sub>2</sub> (e), and WTe<sub>2</sub> (f) as a function of the HNEMD production time. In each panel, the thin transparent lines are from three independent runs, and the red solid and black dashed lines represent the average and error bounds from the individual runs.

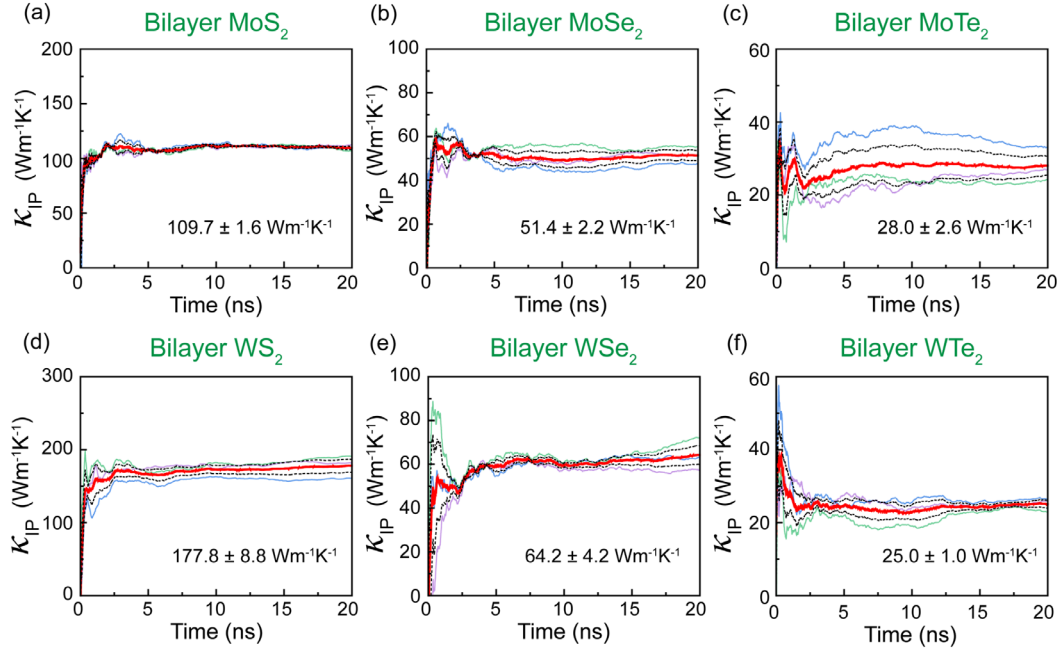

**Figure S19.** Cumulative average of the in-plane thermal conductivity  $\kappa_{IP}$  for bilayer MoS<sub>2</sub> (a), MoSe<sub>2</sub> (b), MoTe<sub>2</sub> (c), WS<sub>2</sub> (d), WSe<sub>2</sub> (e), and WTe<sub>2</sub> (f) as a function of the HNEMD production time. In each panel, the thin transparent lines are from three independent runs, and the red solid and black dashed lines represent the average and error bounds from the individual runs.

**Figure S20** presents the accumulated averages of the cross-plane thermal conductivity for six bulk TMDs (MoS<sub>2</sub>, MoSe<sub>2</sub>, MoTe<sub>2</sub>, WS<sub>2</sub>, WSe<sub>2</sub>, and WTe<sub>2</sub>) at 300 K and zero pressure. The simulations were conducted on a 20-layer square bulk system comprising a total of 17280 atoms, with each layer measuring 5 nm × 5 nm. **Figure S21** presents the accumulated averages of the in-plane and cross-plane thermal conductivity for monolayer, bilayer, and bulk MoS<sub>2</sub> at 300 K and zero pressure using NEP-D3 potential. Both  $\kappa_{IP}$  and  $\kappa_{CP}$  have converged with respect to the production time (20 ns).

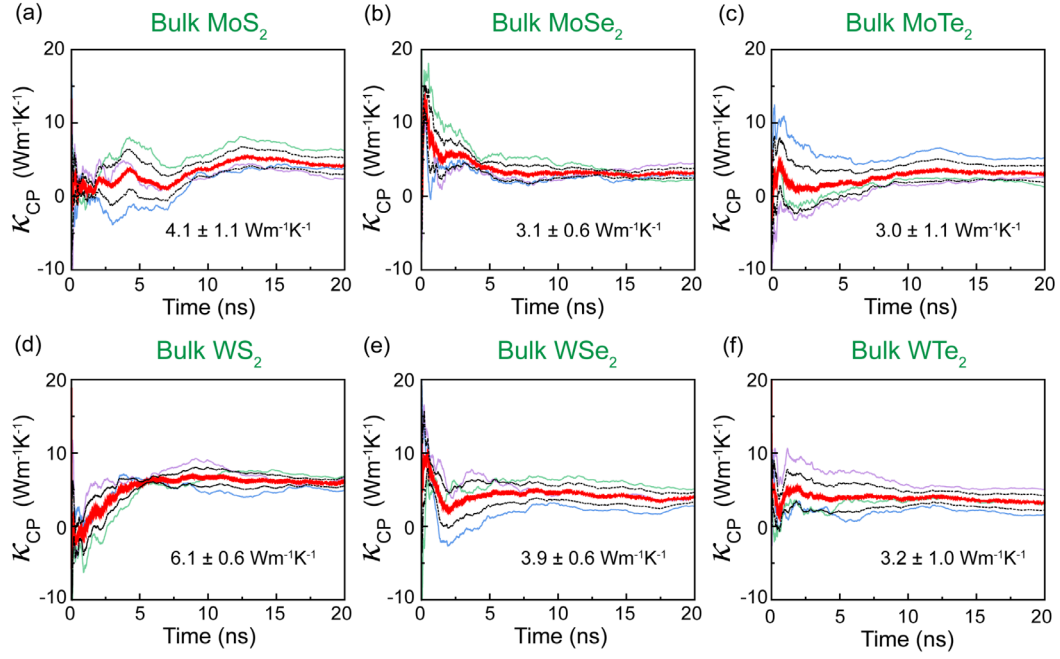

**Figure S20.** Cumulative average of the cross-plane thermal conductivity  $\kappa_{CP}$  for bulk MoS<sub>2</sub> (a), MoSe<sub>2</sub> (b), MoTe<sub>2</sub> (c), WS<sub>2</sub> (d), WSe<sub>2</sub> (e), and WTe<sub>2</sub> (f) as a function of the HNEMD production time. In each panel, the thin transparent lines are from three independent runs, and the red solid and black dashed lines represent the average and error bounds from the individual runs.

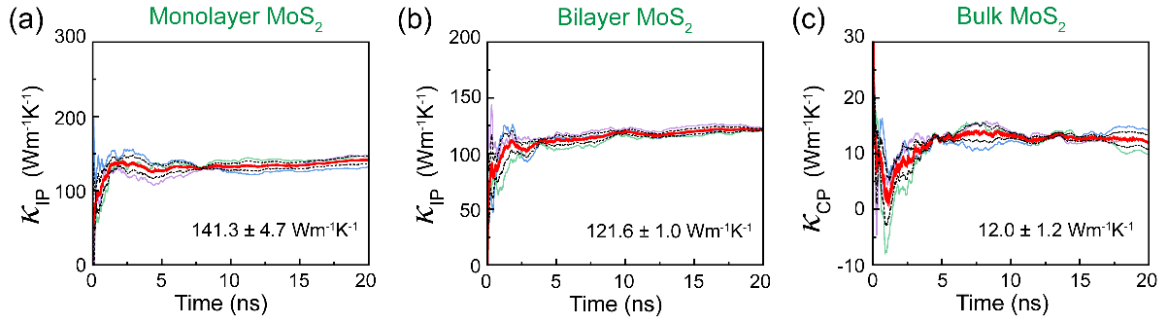

**Figure S21.** Cumulative average of the in-plane thermal conductivity  $\kappa_{IP}$  for monolayer (a) and bilayer (b) MoS<sub>2</sub> and the cross-plane thermal conductivity  $\kappa_{CP}$  for bulk (c) MoS<sub>2</sub> as a function of the HNEMD production time. In each panel, the thin transparent lines are from three independent runs, and the red solid and black dashed lines represent the average and error bounds from the individual runs.

## 6. In-plane and Cross-plane Thermal Conductivity of TMDs

As shown in **Table S6**, **Table S7** and **Table S8**, we summarize the converged in-plane and cross-plane thermal conductivity values for the six monolayer, bilayer, and bulk TMDs obtained from the HNEMD method, together with predicted values reported in the literature obtained using experiment (raman spectroscopy, optothermal raman technique, suspended microelectrodes, time-domain thermoreflectance, and steady-state method) and calculated (nonequilibrium Green’s function, the Green Kubo, nonequilibrium molecular dynamics, homogeneous nonequilibrium molecular dynamics, equilibrium molecular dynamics, the Peierls-Boltzmann equation and the semiempirical Slack equation) methods.

**Table S6.** Literature values for theoretical predictions and experiments of in-plane thermal conductivity  $\kappa_{IP}$  in monolayer TMDs (MoS<sub>2</sub>, MoSe<sub>2</sub>, MoTe<sub>2</sub>, WS<sub>2</sub>, WSe<sub>2</sub>, and WTe<sub>2</sub>) at room temperature, specifying the method used in each calculation and experiment. Nonequilibrium Green’s function (NEGF), Green Kubo (GK), nonequilibrium molecular dynamics (NEMD), homogeneous nonequilibrium molecular dynamics (HNEMD), the equilibrium molecular dynamics (EMD), DFT results either in the Peierls-Boltzmann (BTE) method or the semiempirical Slack approach. MD simulations based on the Stillinger–Weber empirical potentials (SW), the reactive empirical bond-order potential (REBO), the neuroevolution potential (NEP), Lennard-Jones potential (LJ), the Kolmogorov–Crespi potential (KC) and the interlayer potential (ILP).

| Layers    | TMD              | Method                        | $\kappa_{IP}$ (Wm <sup>-1</sup> K <sup>-1</sup> ) | Reference       |         |
|-----------|------------------|-------------------------------|---------------------------------------------------|-----------------|---------|
| Monolayer | MoS <sub>2</sub> | Raman Spectroscopy            | 34.5 ± 4                                          | Yan et al.      | Ref. 15 |
|           | MoS <sub>2</sub> | Raman Spectroscopy            | 62.2                                              | Taube et al.    | Ref. 16 |
|           | MoS <sub>2</sub> | Optothermal Raman Technique   | 84 ± 17                                           | Zhang et al.    | Ref. 17 |
|           | MoS <sub>2</sub> | Raman Spectroscopy            | 19.8                                              | Dolleman et al. | Ref. 18 |
|           | MoS <sub>2</sub> | Raman spectroscopy            | 13.3 ± 1.4                                        | Bae et al.      | Ref. 19 |
|           | MoS <sub>2</sub> | Suspended Microelectrodes     | 24–100                                            | Yang et al.     | Ref. 20 |
|           | MoS <sub>2</sub> | Time-domain Thermoreflectance | 82                                                | Jiang et al.    | Ref. 21 |
|           | MoS <sub>2</sub> | NEMD (SW)                     | 32.9                                              | Zhang et al.    | Ref. 22 |
|           | MoS <sub>2</sub> | EMD, NEMD, HNEMD (SW)         | 193–531                                           | Xu et al.       | Ref. 23 |
|           | MoS <sub>2</sub> | NEMD (SW)                     | 33–54                                             | Wang et al.     | Ref. 24 |

|                   |                               |             |                   |         |
|-------------------|-------------------------------|-------------|-------------------|---------|
| MoS <sub>2</sub>  | NEMD (SW)                     | 19.76       | Ding et al.       | Ref. 25 |
| MoS <sub>2</sub>  | NEMD (SW)                     | 89.43       | Mobaraki et al.   | Ref. 26 |
| MoS <sub>2</sub>  | NEMD (SW)                     | ~90         | Kandemir et al.   | Ref. 27 |
| MoS <sub>2</sub>  | NEGF                          | 23          | Cai et al.        | Ref. 28 |
| MoS <sub>2</sub>  | DFT + Slack                   | 33.6        | Peng et al.       | Ref. 29 |
| MoS <sub>2</sub>  | DFT + BTE                     | 34.5        | Su et al.         | Ref. 30 |
| MoS <sub>2</sub>  | DFT + BTE                     | ~70         | Zulfiqar et al.   | Ref. 31 |
| MoS <sub>2</sub>  | DFT + BTE                     | 83          | Li et al.         | Ref. 32 |
| MoS <sub>2</sub>  | DFT + BTE                     | 103         | Gu et al.         | Ref. 33 |
| MoS <sub>2</sub>  | DFT + BTE                     | 131         | Gandi et al.      | Ref. 34 |
| MoS <sub>2</sub>  | DFT + BTE                     | ~400        | Cepellotti et al. | Ref. 35 |
| MoS <sub>2</sub>  | DFT + BTE                     | 32.4        | Farris et al.     | Ref. 36 |
| MoS <sub>2</sub>  | DFT + BTE                     | 168         | Bao et al.        | Ref. 37 |
| MoS <sub>2</sub>  | DFT + BTE                     | 138–155     | Gu et al.         | Ref. 38 |
| MoS <sub>2</sub>  | HNMED (NEP)                   | 150.4 ± 6.2 | This work         | -       |
| MoSe <sub>2</sub> | Time-domain Thermoreflectance | 35          | Jiang et al.      | Ref. 21 |
| MoSe <sub>2</sub> | Optothermal Raman Technique   | 59 ± 18     | Zhang et al.      | Ref. 17 |
| MoSe <sub>2</sub> | Optothermal Raman Technique   | 38 ± 4      | Mandal et al.     | Ref. 39 |
| MoSe <sub>2</sub> | NEMD (SW)                     | 24.8        | Zhang et al.      | Ref. 22 |
| MoSe <sub>2</sub> | NEMD (SW)                     | 29.05       | Mobaraki et al.   | Ref. 26 |
| MoSe <sub>2</sub> | NEMD (SW)                     | ~40         | Kandemir et al.   | Ref. 27 |
| MoSe <sub>2</sub> | DFT + Slack                   | 17.6        | Peng et al.       | Ref. 29 |
| MoSe <sub>2</sub> | DFT + BTE                     | ~57         | Zulfiqar et al.   | Ref. 31 |
| MoSe <sub>2</sub> | DFT + BTE                     | 54          | Gu et al.         | Ref. 33 |
| MoSe <sub>2</sub> | DFT + BTE                     | 51.5–70.3   | Gupta et al.      | Ref. 40 |
| MoSe <sub>2</sub> | DFT + GK                      | 39          | Gupta et al.      | Ref. 40 |
| MoSe <sub>2</sub> | DFT + BTE                     | 20.6        | Farris et al.     | Ref. 36 |
| MoSe <sub>2</sub> | DFT + BTE                     | ~60         | Kumar et al.      | Ref. 41 |
| MoSe <sub>2</sub> | HNMED (NEP)                   | 76.2 ± 4.3  | This work         | -       |
| MoTe <sub>2</sub> | DFT + BTE                     | ~46         | Zulfiqar et al.   | Ref. 31 |
| MoTe <sub>2</sub> | DFT + BTE                     | 43–49       | Kaur et al.       | Ref. 42 |
| MoTe <sub>2</sub> | DFT + BTE                     | 70.86       | Shen et al.       | Ref. 43 |
| MoTe <sub>2</sub> | DFT + BTE                     | 43.26–45.84 | Zhang et al.      | Ref. 44 |
| MoTe <sub>2</sub> | DFT + BTE                     | 42.2        | Shafique et al.   | Ref. 45 |
| MoTe <sub>2</sub> | HNMED (NEP)                   | 41.7 ± 2.2  | This work         | -       |
| WS <sub>2</sub>   | Raman Spectroscopy            | 32          | Peimyoo et al.    | Ref. 46 |
| WS <sub>2</sub>   | Time-domain Thermoreflectance | 120         | Jiang et al.      | Ref. 21 |

|                  |                               |             |                 |         |
|------------------|-------------------------------|-------------|-----------------|---------|
| WS <sub>2</sub>  | NEMD (SW)                     | 91.66       | Mobaraki et al. | Ref. 26 |
| WS <sub>2</sub>  | DFT + Slack                   | 31.8        | Peng et al.     | Ref. 29 |
| WS <sub>2</sub>  | DFT + BTE                     | 142         | Gu et al.       | Ref. 33 |
| WS <sub>2</sub>  | DFT + BTE                     | 42.2        | Farris et al.   | Ref. 36 |
| WS <sub>2</sub>  | DFT + BTE                     | 113.97      | Zulfiqar et al. | Ref. 31 |
| WS <sub>2</sub>  | DFT + BTE                     | 262.78      | Han et al.      | Ref. 47 |
| WS <sub>2</sub>  | DFT + BTE                     | 212.3       | Bao et al.      | Ref. 37 |
| WS <sub>2</sub>  | DFT + BTE                     | ~215        | et al.          | Ref. 48 |
| WS <sub>2</sub>  | HNMED (NEP)                   | 216.2 ± 7.7 | This work       | -       |
| WSe <sub>2</sub> | Time-domain Thermoreflectance | 42          | Jiang et al.    | Ref. 21 |
| WSe <sub>2</sub> | Raman spectroscopy            | 37 ± 12     | Easy et al.     | Ref. 49 |
| WSe <sub>2</sub> | Raman spectroscopy            | 49 ± 14     | Easy et al.     | Ref. 49 |
| WSe <sub>2</sub> | DFT + BTE                     | ~39         | Zulfiqar et al. | Ref. 31 |
| WSe <sub>2</sub> | DFT + BTE                     | ~32         | Kumar et al.    | Ref. 41 |
| WSe <sub>2</sub> | DFT + BTE                     | ~120        | Zhang et al.    | Ref. 48 |
| WSe <sub>2</sub> | HNMED (NEP)                   | 76.7 ± 4.0  | This work       | -       |
| WTe <sub>2</sub> | DFT + BTE                     | 33.66       | Zulfiqar et al. | Ref. 31 |
| WTe <sub>2</sub> | DFT + BTE                     | 74.69       | Shen et al.     | Ref. 43 |
| WTe <sub>2</sub> | DFT + BTE                     | ~40         | Zhang et al.    | Ref. 48 |
| WTe <sub>2</sub> | HNMED (NEP)                   | 36.5 ± 3.1  | This work       | -       |

**Table S7.** Literature values for theoretical predictions and experiments of in-plane thermal conductivity  $\kappa_{IP}$  in bilayer TMDs (MoS<sub>2</sub>, MoSe<sub>2</sub>, MoTe<sub>2</sub>, WS<sub>2</sub>, WSe<sub>2</sub>, and WTe<sub>2</sub>) at room temperature, specifying the method used in each calculation and experiment.

| Layers  | TMD               | Method                      | $\kappa_{IP}$ (Wm <sup>-1</sup> K <sup>-1</sup> ) | Reference      |         |
|---------|-------------------|-----------------------------|---------------------------------------------------|----------------|---------|
| Bilayer | MoS <sub>2</sub>  | Optothermal Raman Technique | $77 \pm 25$                                       | Zhang et al.   | Ref. 17 |
|         | MoS <sub>2</sub>  | Raman spectroscopy          | $15.6 \pm 1.5$                                    | Bae et al.     | Ref. 19 |
|         | MoS <sub>2</sub>  | NEMD (SW+KC)                | 75.63                                             | Mandal et al.  | Ref. 50 |
|         | MoS <sub>2</sub>  | NEMD (REBO+ILP)             | $15.1 \pm 1.2$                                    | Jiang et al.   | Ref. 51 |
|         | MoS <sub>2</sub>  | NEMD (SW+ILP)               | $40.7 \pm 1.6$                                    | Jiang et al.   | Ref. 51 |
|         | MoS <sub>2</sub>  | DFT + BTE                   | 108–125                                           | Gu et al.      | Ref. 38 |
|         | MoS <sub>2</sub>  | DFT + BTE                   | 199.3                                             | Bao et al.     | Ref. 37 |
|         | MoS <sub>2</sub>  | HNMED (NEP+ILP)             | $109.7 \pm 1.6$                                   | This work      | -       |
|         | MoSe <sub>2</sub> | Optothermal Raman Technique | $42 \pm 13$                                       | Zhang et al.   | Ref. 17 |
|         | MoSe <sub>2</sub> | DFT + BTE                   | ~21                                               | Li et al.      | Ref. 52 |
|         | MoSe <sub>2</sub> | HNMED (NEP+ILP)             | $51.4 \pm 2.2$                                    | This work      | -       |
|         | MoTe <sub>2</sub> | HNMED (NEP+ILP)             | $28.0 \pm 2.6$                                    | This work      | -       |
|         | WS <sub>2</sub>   | Raman Spectroscopy          | 53                                                | Peimyoo et al. | Ref. 46 |
|         | WS <sub>2</sub>   | Steady-state Method         | 124                                               | Pisoni et al.  | Ref. 53 |
|         | WS <sub>2</sub>   | DFT + BTE                   | 269.2                                             | Bao et al.     | Ref. 37 |
|         | WS <sub>2</sub>   | HNMED (NEP+ILP)             | $177.8 \pm 8.8$                                   | This work      | -       |
|         | WSe <sub>2</sub>  | Raman spectroscopy          | $24 \pm 12$                                       | Easy et al.    | Ref. 49 |
|         | WSe <sub>2</sub>  | DFT + BTE                   | 70.91–78.38                                       | Luo et al.     | Ref. 54 |
|         | WSe <sub>2</sub>  | HNMED (NEP+ILP)             | $64.2 \pm 4.2$                                    | This work      | -       |
|         | WTe <sub>2</sub>  | DFT + BTE                   | 55.05–59.97                                       | Luo et al.     | Ref. 54 |
|         | WTe <sub>2</sub>  | HNMED (NEP+ILP)             | $25.0 \pm 1.0$                                    | This work      | -       |

**Table S8.** Literature values for theoretical predictions and experiments of cross-plane thermal conductivity  $\kappa_{CP}$  in bulk TMDs (MoS<sub>2</sub>, MoSe<sub>2</sub>, MoTe<sub>2</sub>, WS<sub>2</sub>, WSe<sub>2</sub>, and WTe<sub>2</sub>) at room temperature, specifying the method used in each calculation and experiment.

| Layer | TMD               | Method                       | $\kappa_{CP}$ (Wm <sup>-1</sup> K <sup>-1</sup> ) | Reference       |         |
|-------|-------------------|------------------------------|---------------------------------------------------|-----------------|---------|
| Bulk  | MoS <sub>2</sub>  | Pump-probe Metrology         | $2.0 \pm 0.3$                                     | Liu et al.      | Ref. 55 |
|       | MoS <sub>2</sub>  | Time-domain Thermorefectance | $\sim 2.3$                                        | Muratore et al. | Ref. 56 |
|       | MoS <sub>2</sub>  | Time-domain Thermorefectance | 0.9–2.0                                           | Sood et al.     | Ref. 57 |
|       | MoS <sub>2</sub>  | Time-domain Thermorefectance | 2.0                                               | Zhu et al.      | Ref. 58 |
|       | MoS <sub>2</sub>  | Time-domain Thermorefectance | $4.75 \pm 0.32$                                   | Jiang et al.    | Ref. 21 |
|       | MoS <sub>2</sub>  | HNEMD (bond-order potential) | $3.7 \pm 0.5$                                     | Kim et al.      | Ref. 59 |
|       | MoS <sub>2</sub>  | NEMD (REBO + ILP)            | $\sim 0.24$                                       | Jiang et al.    | Ref. 51 |
|       | MoS <sub>2</sub>  | NEMD (SW + ILP)              | $\sim 0.47$                                       | Jiang et al.    | Ref. 51 |
|       | MoS <sub>2</sub>  | HNEMD (REBP + LJ)            | $2.0 \pm 0.2$                                     | Xu et al.       | Ref. 23 |
|       | MoS <sub>2</sub>  | EMD (NEP)                    | $\sim 4$                                          | Eriksson et al. | Ref. 60 |
|       | MoS <sub>2</sub>  | DFT + BTE                    | $\sim 5$                                          | Sood et al.     | Ref. 57 |
|       | MoS <sub>2</sub>  | DFT + BTE                    | 5.1                                               | Lindroth et al. | Ref. 61 |
|       | MoS <sub>2</sub>  | HNEMD (NEP + ILP)            | $4.1 \pm 1.1$                                     | This work       | -       |
|       | MoSe <sub>2</sub> | Time-domain Thermorefectance | $\sim 2.8$                                        | Jiang et al.    | Ref. 21 |
|       | MoSe <sub>2</sub> | DFT + BTE                    | $\sim 3.6$                                        | Lindroth et al. | Ref. 61 |
|       | MoSe <sub>2</sub> | HNEMD (NEP + ILP)            | $3.10 \pm 0.6$                                    | This work       | -       |
|       | MoTe <sub>2</sub> | Time-domain Thermorefectance | $\sim 1.4$                                        | Yan et al.      | Ref. 62 |
|       | MoTe <sub>2</sub> | DFT + BTE                    | 2.5                                               | Li et al.       | Ref. 63 |
|       | MoTe <sub>2</sub> | DFT + BTE                    | $\sim 2.9$                                        | Lindroth et al. | Ref. 61 |
|       | MoTe <sub>2</sub> | HNEMD (NEP + ILP)            | $3.0 \pm 1.1$                                     | This work       | -       |
|       | WS <sub>2</sub>   | Time-domain Thermorefectance | $\sim 3$                                          | Jiang et al.    | Ref. 21 |
|       | WS <sub>2</sub>   | DFT + BTE                    | 4.7                                               | Lindroth et al. | Ref. 61 |
|       | WS <sub>2</sub>   | HNEMD (NEP + ILP)            | $6.1 \pm 0.6$                                     | This work       | -       |
|       | WSe <sub>2</sub>  | Time-domain Thermorefectance | $\sim 1.3$                                        | Muratore et al. | Ref. 56 |
|       | WSe <sub>2</sub>  | Time-domain Thermorefectance | $\sim 2.4$                                        | Jiang et al.    | Ref. 21 |
|       | WSe <sub>2</sub>  | DFT + BTE                    | 3.0                                               | Lindroth et al. | Ref. 61 |
|       | WSe <sub>2</sub>  | HNEMD (NEP + ILP)            | $3.9 \pm 0.6$                                     | This work       | -       |
|       | WTe <sub>2</sub>  | DFT + BTE                    | 2.8                                               | Lindroth et al. | Ref. 61 |
|       | WTe <sub>2</sub>  | HNEMD (NEP + ILP)            | $3.2 \pm 1.0$                                     | This work       | -       |

## 7. Binding and Sliding Energy of Bilayer MoS<sub>2</sub> Calculated Using Different DFT Methods

In the main text, we observed that the binding energy and sliding energy barriers calculated using NEP-D3 are approximately twice as large as those obtained from HSE+MBD-NL and NEP+ILP. To elucidate the source of this discrepancy, we conducted a more detailed analysis of the differences in binding energy and sliding energy of bilayer MoS<sub>2</sub> as calculated by various DFT methods (PBE+D3, PBE+MBD, PBE+MBD-NL, and HSE+MBD-NL).

**Figure S22a** shows the equilibrium interlayer distances of bilayer MoS<sub>2</sub> calculated using four different DFT methods as 6.1 Å (PBE+D3), 6.1 Å (PBE+MBD), 6.3 Å (PBE+MBD-NL), and 6.2 Å (HSE+MBD-NL), with the corresponding binding energies at these equilibrium distances being -44.99 meV/atom (PBE+D3), -30.67 meV/atom (PBE+MBD), -19.23 meV/atom (PBE+MBD-NL), and -21.02 meV/atom (HSE+MBD-NL), respectively. Therefore, the significant differences shown in the main text arise because NEP-D3 and NEP+ILP use D3 and MBD-NL, respectively, to describe the interlayer van der Waals interactions. Additionally, the sliding energy at the equilibrium interlayer distance illustrated in **Figure S22b** further highlights the differences between the four DFT methods, with PBE+D3 yielding significantly higher values compared to HSE+MBD-NL.

**Figure S23** presents the sliding potential energy surfaces (PES) calculated using NEP-D3 and NEP+ILP at interlayer distances of 6.0 Å and 6.2 Å, respectively. The sliding PES predicted by NEP-D3 exhibits distinct energy landscapes at different interlayer distances (see **Figures S23a,b**), which can be attributed to the absence of sliding configurations at 6.2 Å in the training dataset, thereby limiting its transferability. To improve the accuracy of NEP-D3 in describing the sliding energy landscape at 6.2 Å, additional training data incorporating sliding configurations at this interlayer distance would be required. In contrast, NEP+ILP demonstrates superior generalizability (see **Figures S23c,d**), making it a more reliable approach for studying interfacial interactions in layered materials.

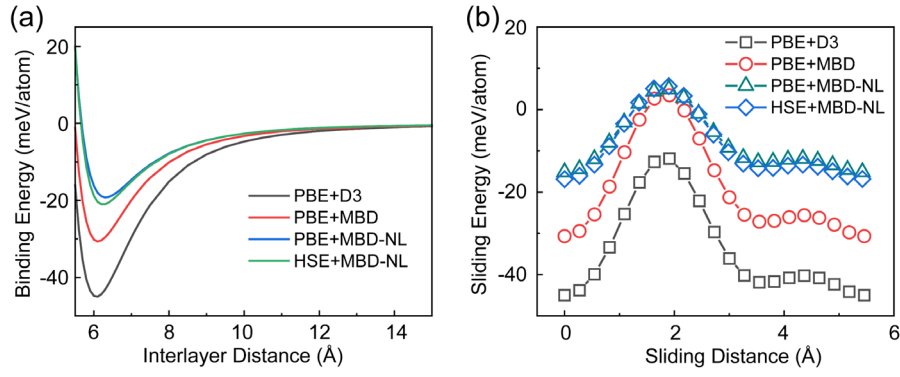

**Figure S22.** (a) Binding energy curves of the laterally periodic structures of bilayer MoS<sub>2</sub> calculated using PBE+D3 (black line), PBE+MBD (red line), PBE+MBD-NL (blue line), and HSE+MBD-NL (green line) methods. The reported energies are measured relative to the value obtained for infinitely separated layers. (b) Sliding energies along the AA'-A'B-AB'-SP path of bilayer MoS<sub>2</sub> with the equilibrium interlayer distance computed from various PBE+D3 (black rectangle), PBE+MBD (red circle), PBE+MBD-NL (green triangle), and HSE+MBD-NL (blue diamond) methods. All the energies are normalized by the total number of atoms in the unit cell (6 atoms).

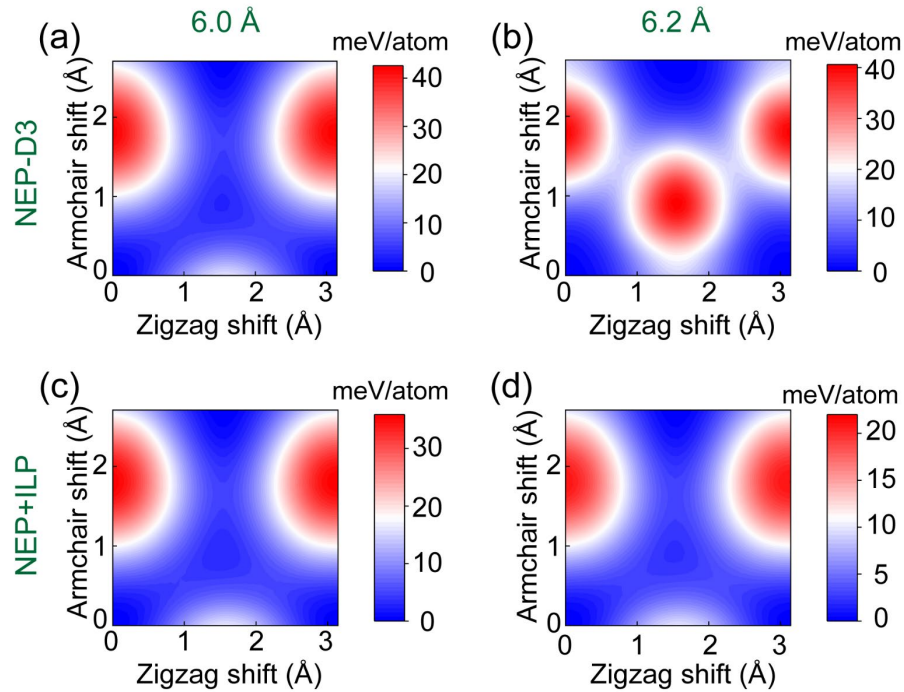

**Figure S23.** Sliding PESs of the laterally periodic bilayer MoS<sub>2</sub>, calculated at an interlayer distance of 6.0 Å (a,c) and 6.2 Å (b,d) for top panels (using NEP-D3 method) and bottom panels (using NEP+ILP method). All the energies are normalized by the total number of atoms in the unit cell (6 atoms).

## References

- (1) Fan, Z.; Wang, Y.; Ying, P.; Song, K.; Wang, J.; Wang, Y.; Zeng, Z.; Xu, K.; Lindgren, E.; Rahm, J. M.; Gabourie, A. J.; Liu, J.; Dong, H.; Wu, J.; Chen, Y.; Zhong, Z.; Sun, J.; Erhart, P.; Su, Y.; Ala-Nissila, T., GPUMD: A package for constructing accurate machine-learned potentials and performing highly efficient atomistic simulations. *J. Chem. Phys.* **2022**, *157* (11), 114801.
- (2) Jiang, W.; Sofer, R.; Gao, X.; Tkatchenko, A.; Kronik, L.; Ouyang, W.; Urbakh, M.; Hod, O., Anisotropic Interlayer Force Field for Group-VI Transition Metal Dichalcogenides. *J. Phys. Chem. A* **2023**, *127* (46), 9820-9830.
- (3) Hermann, J.; Tkatchenko, A., Density Functional Model for van der Waals Interactions: Unifying Many-Body Atomic Approaches with Nonlocal Functionals. *Phys. Rev. Lett.* **2020**, *124* (14), 146401.
- (4) Blum, V.; Gehrke, R.; Hanke, F.; Havu, P.; Havu, V.; Ren, X.; Reuter, K.; Scheffler, M., Ab initio molecular simulations with numeric atom-centered orbitals. *Comput. Phys. Commun.* **2009**, *180* (11), 2175-2196.
- (5) Pisarra, M.; Díaz, C.; Martín, F., Theoretical study of structural and electronic properties of 2H-phase transition metal dichalcogenides. *Phys. Rev. B* **2021**, *103* (19), 195416.
- (6) Zeng, F.; Zhang, W.-B.; Tang, B.-Y., Electronic structures and elastic properties of monolayer and bilayer transition metal dichalcogenides MX<sub>2</sub> (M = Mo, W; X = O, S, Se, Te): A comparative first-principles study. *Chin. Phys. B* **2015**, *24* (9), 097103.
- (7) Murnaghan, F. D., The Compressibility of Media under Extreme Pressures. *Proc. Natl. Acad. Sci. U.S.A.* **1944**, *30* (9), 244-247.
- (8) Hanfland, M.; Beister, H.; Syassen, K., Graphite under pressure: Equation of state and first-order Raman modes. *Phys. Rev. B Condens. Matter* **1989**, *39* (17), 12598-12603.
- (9) Birch, F., Finite Elastic Strain of Cubic Crystals. *Phys. Rev.* **1947**, *71* (11), 809-824.
- (10) Birch, F., Elasticity and constitution of the Earth's interior. *J. Geophys. Res.* **1952**, *57* (2), 227-286.
- (11) Vinet, P.; Ferrante, J.; Smith, J. R.; Rose, J. H., A universal equation of state for solids. *J. Phys. C: Solid State Phys.* **1986**, *19*, L467-L473.
- (12) Vinet, P.; Smith, J. R.; Ferrante, J.; Rose, J. H., Temperature effects on the universal equation of state of solids. *Phys. Rev. B Condens. Matter* **1987**, *35* (4), 1945-1953.
- (13) Hod, O., The registry index: a quantitative measure of materials' interfacial commensurability. *Chemphyschem* **2013**, *14* (11), 2376-91.
- (14) Cao, W.; Hod, O.; Urbakh, M., Interlayer Registry Index of Layered Transition Metal Dichalcogenides. *J Phys. Chem. Lett.* **2022**, *13* (15), 3353-3359.
- (15) Yan, R.; Simpson, J. R.; Bertolazzi, S.; Brivio, J.; Watson, M.; Wu, X.; Kis, A.; Luo, T.; Hight Walker, A. R.; Xing, H. G., Thermal Conductivity of Monolayer Molybdenum Disulfide Obtained from Temperature-Dependent Raman Spectroscopy. *ACS Nano* **2014**, *8* (1), 986-993.
- (16) Taube, A.; Judek, J.; Łapińska, A.; Zdrojek, M., Temperature-Dependent Thermal Properties of Supported MoS<sub>2</sub> Monolayers. *ACS Appl. Mater. Interfaces* **2015**, *7* (9), 5061-5065.
- (17) Zhang, X.; Sun, D.; Li, Y.; Lee, G.-H.; Cui, X.; Chenet, D.; You, Y.; Heinz, T. F.; Hone, J. C., Measurement of Lateral and Interfacial Thermal Conductivity of Single- and Bilayer MoS<sub>2</sub> and MoSe<sub>2</sub> Using Refined Optothermal Raman Technique. *ACS Appl. Mater. Interfaces* **2015**,

7 (46), 25923-25929.

- (18) Dolleman, R. J.; Lloyd, D.; Lee, M.; Bunch, J. S.; van der Zant, H. S. J.; Steeneken, P. G., Transient thermal characterization of suspended monolayer MoS<sub>2</sub>. *Phys. Rev. Mater.* **2018**, 2 (11), 114008.
- (19) Bae, J. J.; Jeong, H. Y.; Han, G. H.; Kim, J.; Kim, H.; Kim, M. S.; Moon, B. H.; Lim, S. C.; Lee, Y. H., Thickness-dependent in-plane thermal conductivity of suspended MoS<sub>2</sub> grown by chemical vapor deposition. *Nanoscale* **2017**, 9 (7), 2541-2547.
- (20) Yang, X.; Zheng, X.; Liu, Q.; Zhang, T.; Bai, Y.; Yang, Z.; Chen, H.; Liu, M., Experimental Study on Thermal Conductivity and Rectification in Suspended Monolayer MoS<sub>2</sub>. *ACS Appl. Mater. Interfaces* **2020**, 12 (25), 28306-28312.
- (21) Jiang, P.; Qian, X.; Gu, X.; Yang, R., Probing Anisotropic Thermal Conductivity of Transition Metal Dichalcogenides MX<sub>2</sub> (M = Mo, W and X = S, Se) using Time-Domain Thermoreflectance. *Adv. Mater.* **2017**, 29 (36), 1701068.
- (22) Zhang, J.; Hong, Y.; Wang, X.; Yue, Y.; Xie, D.; Jiang, J.; Xiong, Y.; Li, P., Phonon Thermal Properties of Transition-Metal Dichalcogenides MoS<sub>2</sub> and MoSe<sub>2</sub> Heterostructure. *J. Phys. Chem. C* **2017**, 121 (19), 10336-10344.
- (23) Xu, K.; Gabourie, A. J.; Hashemi, A.; Fan, Z.; Wei, N.; Farimani, A. B.; Komsa, H.-P.; Krashennnikov, A. V.; Pop, E.; Ala-Nissila, T., Thermal transport in MoS<sub>2</sub> from molecular dynamics using different empirical potentials. *Phys. Rev. B* **2019**, 99 (5), 054303.
- (24) Wang, X.; Tabarraei, A., Phonon thermal conductivity of monolayer MoS<sub>2</sub>. *Appl. Phys. Lett.* **2016**, 108 (19), 191905.
- (25) Ding, Z.; Jiang, J.-W.; Pei, Q.-X.; Zhang, Y.-W., In-plane and cross-plane thermal conductivities of molybdenum disulfide. *Nanotechnology* **2015**, 26 (6), 065703.
- (26) Mobaraki, A.; Sevik, C.; Yapicioglu, H.; Çakır, D.; Gülseren, O., Temperature-dependent phonon spectrum of transition metal dichalcogenides calculated from the spectral energy density: Lattice thermal conductivity as an application. *Phys. Rev. B* **2019**, 100 (3), 035402.
- (27) Kandemir, A.; Yapicioglu, H.; Kinaci, A.; Çağın, T.; Sevik, C., Thermal transport properties of MoS<sub>2</sub> and MoSe<sub>2</sub> monolayers. *Nanotechnology* **2016**, 27 (5), 055703.
- (28) Cai, Y.; Lan, J.; Zhang, G.; Zhang, Y.-W., Lattice vibrational modes and phonon thermal conductivity of monolayer MoS<sub>2</sub>. *Phys. Rev. B* **2014**, 89 (3), 035438.
- (29) Peng, B.; Zhang, H.; Shao, H.; Xu, Y.; Zhang, X.; Zhu, H., Thermal conductivity of monolayer MoS<sub>2</sub>, MoSe<sub>2</sub>, and WS<sub>2</sub>: interplay of mass effect, interatomic bonding and anharmonicity. *RSC Adv.* **2016**, 6 (7), 5767-5773.
- (30) Su, J.; Liu, Z.-t.; Feng, L.-p.; Li, N., Effect of temperature on thermal properties of monolayer MoS<sub>2</sub> sheet. *J. Alloys Compd.* **2015**, 622, 777-782.
- (31) Zulfiqar, M.; Zhao, Y.; Li, G.; Li, Z.; Ni, J., Intrinsic Thermal conductivities of monolayer transition metal dichalcogenides MX<sub>2</sub> (M = Mo, W; X = S, Se, Te). *Sci. Rep.* **2019**, 9 (1), 4571.
- (32) Li, W.; Carrete, J.; Mingo, N., Thermal conductivity and phonon linewidths of monolayer MoS<sub>2</sub> from first principles. *Appl. Phys. Lett.* **2013**, 103 (25), 253103.
- (33) Gu, X.; Yang, R., Phonon transport in single-layer transition metal dichalcogenides: A first-principles study. *Appl. Phys. Lett.* **2014**, 105 (13), 131903.
- (34) Gandi, A. N.; Schwingenschlögl, U., Thermal conductivity of bulk and monolayer MoS<sub>2</sub>. *Europhys. Lett.* **2016**, 113 (3), 36002.
- (35) Cepellotti, A.; Fugallo, G.; Paulatto, L.; Lazzeri, M.; Mauri, F.; Marzari, N., Phonon

hydrodynamics in two-dimensional materials. *Nat. Commun.* **2015**, 6 (1), 6400.

(36) Farris, R.; Hellman, O.; Zanolli, Z.; Saleta Reig, D.; Varghese, S.; Ordejón, P.; Tielrooij, K.-J.; Verstraete, M. J., Microscopic understanding of the in-plane thermal transport properties of 2H transition metal dichalcogenides. *Phys. Rev. B* **2024**, 109 (12), 125422.

(37) Bao, W.; Chen, G.; Wang, Z.; Tang, D., Bilateral phonon transport modulation of Bi-layer TMDCs (MX<sub>2</sub>, M=Mo, W; X=S). *Int. J. Therm. Sci.* **2022**, 179, 107669.

(38) Gu, X.; Li, B.; Yang, R., Layer thickness-dependent phonon properties and thermal conductivity of MoS<sub>2</sub>. *J. Appl. Phys.* **2016**, 119 (8), 085106.

(39) Mandal, M.; Maity, N.; Barman, P. K.; Srivastava, A.; Singh, A. K.; Nayak, P. K.; Sethupathi, K., Probing angle-dependent thermal conductivity in twisted bilayer MoSe<sub>2</sub>. *Phys. Rev. B* **2023**, 108 (11), 115439.

(40) Gupta, M. K.; Kumar, S.; Mittal, R.; Mishra, S. K.; Rols, S.; Delaire, O.; Thamizhavel, A.; Sastry, P. U.; Chaplot, S. L., Distinct anharmonic characteristics of phonon-driven lattice thermal conductivity and thermal expansion in bulk MoSe<sub>2</sub> and WSe<sub>2</sub>. *J. Mater. Chem. A* **2023**, 11 (40), 21864-21873.

(41) Kumar, S.; Schwingenschlögl, U., Thermoelectric Response of Bulk and Monolayer MoSe<sub>2</sub> and WSe<sub>2</sub>. *Chem. Mater.* **2015**, 27 (4), 1278-1284.

(42) Kaur, B.; Gupta, R.; Dhiman, S.; Kaur, K.; Bera, C., Anisotropic thermoelectric figure of merit in MoTe<sub>2</sub> monolayer. *Phys. B* **2023**, 661, 414898.

(43) Shen, J.; Han, D.; Zhang, B.; Cao, R.; Liu, Y.; Zheng, S.; Li, H.; Jiang, Y.; Xue, Y.; Xue, M., First-principles study on phonon transport properties of MoTe<sub>2</sub> and WTe<sub>2</sub> monolayers in different phases. *Phys. E* **2023**, 145, 115509.

(44) Zhang, D.; Ren, W.; Wang, K.; Chen, S.; Zhang, L.; Ni, Y.; Zhang, G., A thermal conductivity switch via the reversible 2H-1T' phase transition in monolayer MoTe<sub>2</sub>. *Chin. Phys. B* **2023**, 32 (5), 050505.

(45) Shafique, A.; Shin, Y.-H., Strain engineering of phonon thermal transport properties in monolayer 2H-MoTe<sub>2</sub>. *Phys. Chem. Chem. Phys.* **2017**, 19 (47), 32072-32078.

(46) Peimyoo, N.; Shang, J.; Yang, W.; Wang, Y.; Cong, C.; Yu, T., Thermal conductivity determination of suspended mono- and bilayer WS<sub>2</sub> by Raman spectroscopy. *Nano Res.* **2015**, 8 (4), 1210-1221.

(47) Han, D.; Sun, H.; Ding, W.; Chen, Y.; Wang, X.; Cheng, L., Effect of biaxial strain on thermal transport in WS<sub>2</sub> monolayer from first principles calculations. *Phys. E Low-Dimens. Syst. Nanostruct.* **2020**, 124, 114312.

(48) Zhang, Z.; Xie, Y.; Ouyang, Y.; Chen, Y., A systematic investigation of thermal conductivities of transition metal dichalcogenides. *Int. J. Heat Mass Transf.* **2017**, 108, 417-422.

(49) Easy, E.; Gao, Y.; Wang, Y.; Yan, D.; Goushehgir, S. M.; Yang, E.-H.; Xu, B.; Zhang, X., Experimental and Computational Investigation of Layer-Dependent Thermal Conductivities and Interfacial Thermal Conductance of One- to Three-Layer WSe<sub>2</sub>. *ACS Appl. Mater. Interfaces* **2021**, 13 (11), 13063-13071.

(50) Mandal, S.; Maity, I.; Das, A.; Jain, M.; Maiti, P. K., Tunable lattice thermal conductivity of twisted bilayer MoS<sub>2</sub>. *Phys. Chem. Chem. Phys.* **2022**, 24 (22), 13860-13868.

(51) Jiang, W.; Liang, T.; Xu, J.; Ouyang, W., Twist-Dependent Anisotropic Thermal Conductivity in Homogeneous MoS<sub>2</sub> Stacks. *Int. J. Heat Mass Transf.* **2023**, 217, 124662.

- (52) Li, W.; Yang, L.; Yang, K., Tunable lattice thermal conductivity of 2D MoSe<sub>2</sub> via biaxial strain: a comparative study between the monolayer and bilayer. *Appl. Phys. A* **2024**, *130* (5), 356.
- (53) Pisoni, A.; Jacimovic, J.; Gaál, R.; Náfrádi, B.; Berger, H.; Révay, Z.; Forró, L., Anisotropic transport properties of tungsten disulfide. *Scripta Mater.* **2016**, *114*, 48-50.
- (54) Luo, Y.; Lan, J.-Q.; Zhang, T.; Hu, C.-E.; Chen, X.-R.; Geng, H.-Y., Strain dependences of electronic properties, band alignments and thermal properties of bilayer WX<sub>2</sub> (X = Se, Te). *Philos. Mag.* **2022**, *102* (22), 2323-2343.
- (55) Liu, J.; Choi, G.-M.; Cahill, D. G., Measurement of the anisotropic thermal conductivity of molybdenum disulfide by the time-resolved magneto-optic Kerr effect. *J. Appl. Phys.* **2014**, *116* (23), 233107.
- (56) Muratore, C.; Varshney, V.; Gengler, J. J.; Hu, J. J.; Bultman, J. E.; Smith, T. M.; Shamberger, P. J.; Qiu, B.; Ruan, X.; Roy, A. K.; Voevodin, A. A., Cross-plane thermal properties of transition metal dichalcogenides. *Appl. Phys. Lett.* **2013**, *102* (8), 081604.
- (57) Sood, A.; Xiong, F.; Chen, S.; Cheaito, R.; Lian, F.; Asheghi, M.; Cui, Y.; Donadio, D.; Goodson, K. E.; Pop, E., Quasi-Ballistic Thermal Transport Across MoS<sub>2</sub> Thin Films. *Nano Lett.* **2019**, *19* (4), 2434-2442.
- (58) Zhu, G.; Liu, J.; Zheng, Q.; Zhang, R.; Li, D.; Banerjee, D.; Cahill, D. G., Tuning thermal conductivity in molybdenum disulfide by electrochemical intercalation. *Nat. Commun.* **2016**, *7* (1), 13211.
- (59) Kim, S. E.; Mujid, F.; Rai, A.; Eriksson, F.; Suh, J.; Poddar, P.; Ray, A.; Park, C.; Fransson, E.; Zhong, Y.; Muller, D. A.; Erhart, P.; Cahill, D. G.; Park, J., Extremely anisotropic van der Waals thermal conductors. *Nature* **2021**, *597* (7878), 660-665.
- (60) Eriksson, F.; Fransson, E.; Linderälv, C.; Fan, Z.; Erhart, P., Tuning the Through-Plane Lattice Thermal Conductivity in van der Waals Structures through Rotational (Dis)ordering. *ACS Nano* **2023**, *17* (24), 25565-25574.
- (61) Lindroth, D. O.; Erhart, P., Thermal transport in van der Waals solids from first-principles calculations. *Phys. Rev. B* **2016**, *94* (11), 115205.
- (62) Yan, X.-J.; Lv, Y.-Y.; Li, L.; Li, X.; Yao, S.-H.; Chen, Y.-B.; Liu, X.-P.; Lu, H.; Lu, M.-H.; Chen, Y.-F., Investigation on the phase-transition-induced hysteresis in the thermal transport along the c-axis of MoTe<sub>2</sub>. *npj Quantum Mater.* **2017**, *2* (1), 31.
- (63) Li, H.; Pandey, T.; Jiang, Y.; Gu, X.; Lindsay, L.; Koh, Y. K., Origins of heat transport anisotropy in MoTe<sub>2</sub> and other bulk van der Waals materials. *Mater. Today Phys.* **2023**, *37*, 101196.
